1 Identification of a novel tetrameric structure for human apolipoprotein-D

2  
3 **Claudia S. Kielkopf<sup>a,b,c</sup>, Jason K.K. Low<sup>d</sup>, Yee-Foong Mok<sup>e</sup>, Surabhi Bhatia<sup>a,b,1</sup>, Tony Palasovski<sup>f,g,h</sup>,**  
4 **Aaron J. Oakley<sup>a,c,i</sup>, Andrew E. Whitten<sup>j</sup>, Brett Garner<sup>a,b,c</sup>, Simon H.J. Brown<sup>a,b,c\*</sup>**

5  
6 From the <sup>a</sup>Illawarra Health and Medical Research Institute, University of Wollongong, Wollongong,  
7 NSW, Australia; <sup>b</sup>School of Biological Sciences, University of Wollongong, Wollongong, NSW,  
8 Australia; <sup>c</sup>Molecular Horizons, University of Wollongong, Wollongong, NSW, Australia; <sup>d</sup>School of  
9 Life and Environmental Sciences, University of Sydney, Sydney, NSW, Australia; <sup>e</sup>Department of  
10 Biochemistry and Molecular Biology, Bio21 Molecular Science and Biotechnology Institute, University  
11 of Melbourne, Parkville, VIC, Australia; <sup>f</sup>Illawarra and Shoalhaven Local Health District (ISLHD),  
12 Wollongong, NSW, Australia; <sup>g</sup>Specialist Breast Clinic Sutherland Shire and Wollongong, NSW,  
13 Australia; <sup>h</sup>Integrated Specialist Health Care Sutherland Shire, NSW, Australia. <sup>i</sup>School of Chemistry,  
14 University of Wollongong, Wollongong, NSW, Australia; <sup>j</sup>Australian Nuclear Science and Technology  
15 Organisation, Lucas Heights, NSW, Australia;

16  
17 <sup>1</sup>Present address: Brain and Mind Centre, University of Sydney, Sydney, NSW, Australia

18 \* To whom correspondence should be addressed: Simon H.J. Brown: Illawarra Health and Medical  
19 Research Institute, Room 230, Building 32, Northfields Ave, University of Wollongong, NSW 2522,  
20 AUSTRALIA; [simonb@uow.edu.au](mailto:simonb@uow.edu.au); T: + 61 2 4298 1991; F: + 61 2 4221 8130

21  
22 Authors' email addresses:

23 Claudia S. Kielkopf: [csk676@uowmail.edu.au](mailto:csk676@uowmail.edu.au)

24 Jason K.K. Low: [jason.low@sydney.edu.au](mailto:jason.low@sydney.edu.au)

25 Yee-Foong Mok: [ymok@unimelb.edu.au](mailto:ymok@unimelb.edu.au)

26 Surabhi Bhatia: [surabhi.bhatia@sydney.edu.au](mailto:surabhi.bhatia@sydney.edu.au)

27 Tony Palasovski: [drpalasovski@gmail.com](mailto:drpalasovski@gmail.com)

28 Aaron J. Oakley: [aarono@uow.edu.au](mailto:aarono@uow.edu.au)

29 Andrew E. Whitten: [awh@ansto.gov.au](mailto:awh@ansto.gov.au)

30 Brett Garner: [brettg@uow.edu.au](mailto:brettg@uow.edu.au)

31 Simon H.J. Brown: [simonb@uow.edu.au](mailto:simonb@uow.edu.au)

32  
33 **Keywords:** Lipocalin, oligomerization, apolipoprotein structure, small-angle x-ray scattering (SAXS),  
34 lipid, lipocalin structure

35

36 **FOOTNOTE**

37 **Abbreviations**

38 AA: Arachidonic acid; AD: Alzheimer's disease; ADH: Adipic acid dihydrazide; ApoD: Apolipoprotein-  
39 D; AUC: Analytical ultracentrifugation; BCF: Breast cyst fluid; BSA: Bovine serum albumin; CSF:  
40 Cerebrospinal fluid; CV: Column volume; DMTMM: 4-(4,6-dimethoxy-1,3,5-triazin-2-yl)-4-  
41 methylmorpholinium chloride; FDR: False discovery rates; HIC: Hydrophobic interaction  
42 chromatography; IEX: Ion exchange chromatography; LC-MS/MS: Liquid chromatography-Tandem  
43 mass spectrometry; MALLS: Multi-angle laser light scattering; NSD: Normalised spatial discrepancy;  
44 SAXS: Small-angle X-ray scattering; SEC: Size exclusion chromatography; XL-MS: Crosslinking mass  
45 spectrometry; ZLXL: Zero-length crosslinks

46

47

48 **ABSTRACT**

49 Apolipoprotein-D is a 25 kDa glycosylated member of the lipocalin family that folds into an eight-  
50 stranded  $\beta$ -barrel with a single adjacent  $\alpha$ -helix. Apolipoprotein-D specifically binds a range of small  
51 hydrophobic ligands such as progesterone and arachidonic acid and has an antioxidant function that is in  
52 part due to the reduction of peroxidised lipids by methionine-93. Therefore, apolipoprotein-D plays  
53 multiple roles throughout the body and is protective in Alzheimer's disease, where apolipoprotein-D  
54 overexpression reduces the amyloid- $\beta$  burden in Alzheimer's disease mouse models.

55 Oligomerisation is a common feature of lipocalins that can influence ligand binding. The native structure  
56 of apolipoprotein-D, however, has not been conclusively defined. Apolipoprotein-D is generally  
57 described as a monomeric protein, although it dimerises when reducing peroxidised lipids.

58 Here, we investigated the native structure of apolipoprotein-D derived from plasma, breast cyst fluid  
59 (BCF) and cerebrospinal fluid. In plasma and cerebrospinal fluid, apolipoprotein-D was present in high-  
60 molecular weight complexes, potentially in association with lipoproteins. In contrast, apolipoprotein-D in  
61 BCF formed distinct oligomeric species. We assessed apolipoprotein-D oligomerisation using native  
62 apolipoprotein-D purified from BCF and a suite of complementary methods, including multi-angle laser  
63 light scattering, analytical ultracentrifugation and small-angle X-ray scattering. Our analyses showed that  
64 apolipoprotein-D predominantly forms a ~95 to ~100 kDa tetramer. Small-angle X-ray scattering analysis  
65 confirmed these findings and provided a structural model for apolipoprotein-D tetramer. These data  
66 indicate apolipoprotein-D rarely exists as a free monomer under physiological conditions and provide  
67 insights into novel native structures of apolipoprotein-D and into oligomerisation behaviour in the  
68 lipocalin family.

69

## 70 INTRODUCTION

71 Human apolipoprotein-D (apoD) is a 169 amino acid glycoprotein member of the lipocalin family. In this  
72 protein family, affiliation is not based on sequence homology but rather on structural homology  
73 (Akerstrom et al., 2000). The crystal structure of an apoD monomer reveals a typical lipocalin fold with  
74 an eight-stranded antiparallel  $\beta$ -barrel flanked by an  $\alpha$ -helix (Eichinger et al., 2007). Two disulphide  
75 bridges tether loops to the central  $\beta$ -barrel and a fifth cysteine is free (Eichinger et al., 2007). The apoD  $\beta$ -  
76 barrel encloses a conical shaped hydrophobic cavity, referred to as the apoD ligand-binding pocket. Early  
77 studies suggested that apoD can bind a range of lipids, including arachidonic acid (AA), cholesterol and  
78 several steroids (Dilley et al., 1990; Lea, 1988; Morais Cabral et al., 1995; Pearlman et al., 1973). More  
79 recent studies indicate that the binding of lipids in the apoD binding pocket is in fact specific (Eichinger  
80 et al., 2007; Vogt and Skerra, 2001). Progesterone and AA both bind to the apoD binding pocket with  
81 high affinity, whereas pregnenolone and specific eicosanoids (e.g. 12-HETE and 5,15-diHETE) bind with  
82 reduced affinity (Dilley et al., 1990; Lea, 1988; Morais Cabral et al., 1995). Cholesterol does not  
83 appreciably bind within the apoD binding pocket (Morais Cabral et al., 1995). Additionally, apoD may  
84 also interact with lipids via a region of surface hydrophobicity, due to exposed hydrophobic residues  
85 located in three of its extended loops (Eichinger et al., 2007). Located close to the open end of the binding  
86 pocket, this hydrophobic cluster may facilitate apoD association with high-density lipoprotein (HDL)  
87 particles and permit insertion of apoD into cellular lipid membranes (Eichinger et al., 2007). This  
88 hydrophobic surface explains observations that apoD binds a range of lipophilic molecules. We have  
89 shown that oxidised (hydroperoxy) forms of eicosatetraenoic acids bind to this hydrophobic surface,  
90 where the potential radical-generating lipid hydroperoxide (L-OOH) moiety is reduced to an inert lipid  
91 hydroxide (L-OH), thereby inhibiting lipid peroxy radical “propagation” of free radical-mediated lipid  
92 oxidation (Bhatia et al., 2012a; Oakley et al., 2012). This antioxidant action of apoD is critically  
93 dependent on the redox active side chain of M93 that is reversibly converted to methionine sulfoxide  
94 (MetSO) in the reaction. Creation of the MetSO destabilises an extended loop close to the entrance of the  
95 ligand binding pocket which in turn promotes apoD dimerisation (Bhatia et al., 2012a; Oakley et al.,  
96 2012).

97 ApoD is cleaved from a 189 amino acid precursor and has two N-linked glycosylation sites on N45 and  
98 N78 that in plasma are mainly trisialo triantennary (N45) and fucose disialo biantennary (N78) structures  
99 (Schindler et al., 1995). For consistency, all residue numbers given in this manuscript are based on the  
100 mature apoD sequence. The addition of the theoretical glycan masses to the molecular weight of apoD  
101 leads to a total mass of 24.52 kDa. However, on reducing SDS-PAGE, apoD is retained at an apparent  
102 molecular weight of up to 32 kDa (Balbín et al., 1990). The physiological range of apoD concentration

103 depends on the fluid. The apoD concentration in plasma ranges from 0.05 to 0.2 mg/ml (Van Dijk et al.,  
104 2013), in breast cyst fluid (BCF) ranges from 13.7 to 15.1 mg/ml (Sánchez et al., 1992) and in  
105 cerebrospinal fluid (CSF) is reported to be 0.0012 mg/ml (Terrisse et al., 1998). The glycosylation pattern  
106 of apoD depends on the expression site, as apoD glycosylation in axillary secretion (Zeng et al., 1996)  
107 differs from plasma (Schindler et al., 1995), which in turn is different from apoD expressed in the brain  
108 (Li et al., 2016).

109 ApoD appears to play a protective role in Alzheimer's disease (AD) most likely by combating oxidative  
110 stress and neuroinflammation. Increased apoD dimer formation is observed in AD brain samples (Bhatia  
111 et al., 2013), suggesting that apoD can directly abate oxidative stress in AD by reducing peroxidised  
112 lipids. Accordingly, apoD expression is increased in the brain and CSF of AD patients (Terrisse et al.,  
113 1998). In mouse studies, overexpression of apoD in an AD model decreases the A $\beta$  burden in the brain  
114 (Li et al., 2015). Furthermore, apoD was recently shown to protect a vulnerable subset of lysosomes under  
115 oxidative stress conditions (Pascua-Maestro et al., 2017).

116 Previous studies show that the formation of dimers or higher order oligomers is a common feature in  
117 lipocalins (Akerstrom et al., 2000; Gasymov et al., 2007; Huber et al., 1987a). Such oligomerisation has  
118 been characterised by size exclusion chromatography (SEC) and multi-angle laser light scattering  
119 (MALLS) (Gasymov et al., 2007), analytical ultracentrifugation (AUC) (Gouveia and Tiffany, 2005),  
120 small-angle X-ray scattering (SAXS) and native PAGE (Kozak and Grubb, 2007). Interestingly, the  
121 oligomeric state of lipocalins has been linked to their ligand binding functions (Gamiz-Hernandez et al.,  
122 2015; Gutierrez-Magdaleno et al., 2013). Ligand binding of  $\beta$ -lactoglobulin leads to dimer dissociation  
123 (Gutierrez-Magdaleno et al., 2013) and the function of crustacyanin as pigmentation protein is critically  
124 dependent on dimer formation (Gamiz-Hernandez et al., 2015). Unlike these lipocalins, apoD is described  
125 as a monomer by most publications (Akerstrom et al., 2000; Nasreen et al., 2006), apart from reports of  
126 non-disulphide linked dimers formed upon reducing peroxidised lipids *in vitro* (Bhatia et al., 2012a) and  
127 in Alzheimer's disease (AD) brain tissue (Bhatia et al., 2013). Disulphide-linked apoD dimers are found  
128 in urine (Blanco-Vaca and Pownall, 1993) and tears (Holzfeind et al., 1995).

129 Given that oligomerisation is a common feature of other lipocalins, in the present study we investigated  
130 the native structure of apoD in human apoD-containing fluids. Specifically, utilising BCF as source of  
131 apoD, we examined the native apoD structure in a suite of complementary analytical experiments that  
132 enabled us to generate a robust data set which, for the first time, indicate that apoD forms a tetramer  
133 under native conditions.

134

## 135 **MATERIALS AND METHODS**

### 136 *Chemicals and Reagents*

137 All chemicals were biotechnology grade or similar. Tris, piperazine and glycerol were sourced from  
138 Sigma (Castle Hill, NSW, Australia), NaCl and ammonium sulphate were from Astral Scientific (Gynea,  
139 NSW, Australia), mono- and di-sodium phosphate from Ajax Finechem and Sigma (Castle Hill, NSW,  
140 Australia), respectively, and DTT from Astral Scientific (Gynea, NSW, Australia).

141

#### 142 ***Fluid sample collection and preparation***

143 Breast examination was performed and BCF was collected by point of care ultrasound with aspiration of  
144 cyst by TP. BCF was stored at 4°C and transferred from the clinic to the laboratory within 4 hours of  
145 collection. A protease inhibitor cocktail (Sigma, 1:100 dilution) was added, particulate was removed by  
146 centrifugation at  $23k \times g$  for 20 min and BCF aliquots were stored at  $-80^{\circ}\text{C}$ .

147 Plasma was obtained by collection of 5 ml of whole blood in EDTA collection tubes (BD vacutainer),  
148 incubated at  $22^{\circ}\text{C}$  for 30 min and then centrifuged for 10 min at  $1400 \times g$ . The plasma fraction was  
149 carefully transferred to a new tube without disturbing the red blood cells. Protease inhibitor cocktail  
150 (Sigma, 1:100 dilution) was added and plasma aliquots were stored at  $-80^{\circ}\text{C}$ .

151 CSF (Lee Bioscience) consisted of pooled CSF from healthy human subjects. The obtained vials were  
152 stored at  $-80^{\circ}\text{C}$  and before use, thawed on ice and protease inhibitor cocktail (Sigma, 1:100 dilution) was  
153 added.

154 All fluids were thawed on ice and particulates were removed by centrifugation at  $16k \times g$  for 20 min at  
155  $4^{\circ}\text{C}$  immediately before use. An overview of the following experimental design is shown in Figure 1.

156

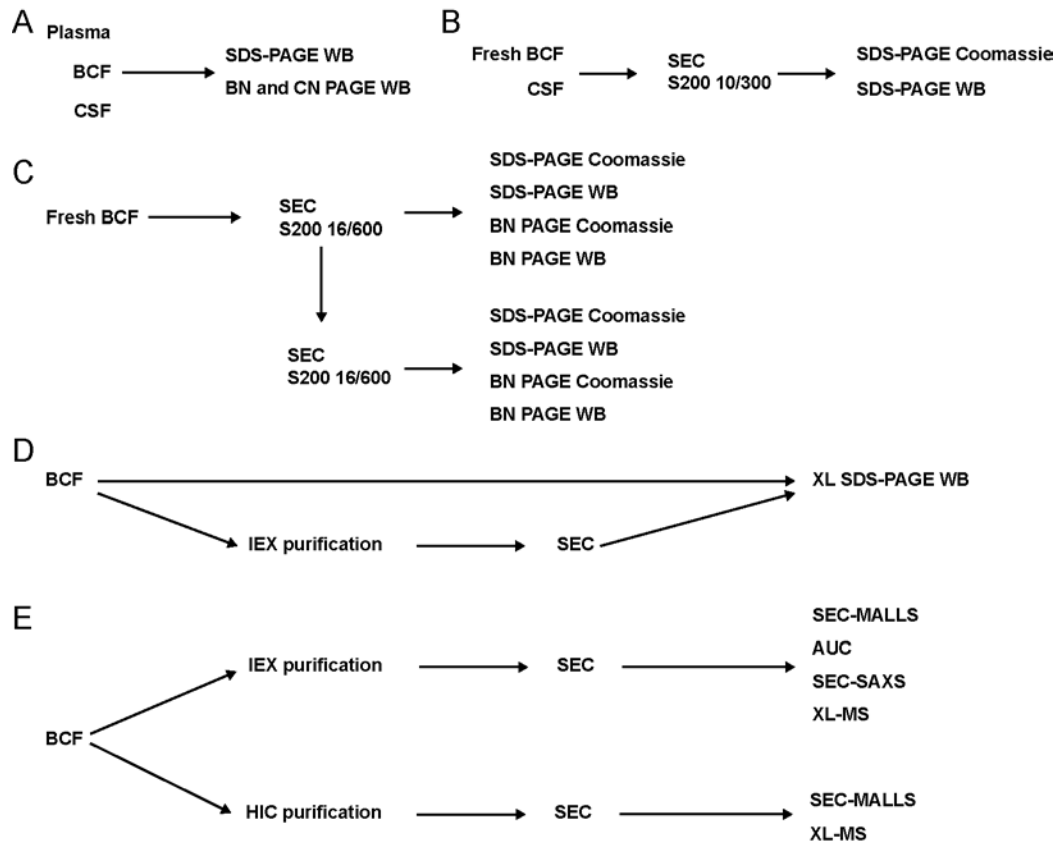

157

158 **Fig. 1.**

159

160 ***Characterisation of BCF apoD by FPLC and HPLC SEC***

161 FPLC was performed on an NGC Scout system (Bio-Rad) and HPLC on an 1100 Series HPLC system  
162 (Agilent).

163 BCF was applied neat or at the dilution described below to three formats of SEC; GE Superdex 200  
164 16/600 (bed volume ~120 ml), GE Superdex 200 Increase 10/300 (bed volume ~24 ml), and a TOSOH  
165 TSKgel Ultra SW Aggregate (bed volume ~14 ml). Fraction volumes collected were 2 ml (S200 16/600)  
166 and 5 µl (S200 10/300). Superdex columns were equilibrated into buffer containing 25 mM Tris, 150 mM  
167 NaCl, pH 8.0, using the Superdex 16/600 at a flow rate of 0.75 ml/min with a BCF injection volume of  
168 200 µl, and the Superdex 10/300 at a flow rate of 0.5 ml/min with a BCF injection volume of 100 µl  
169 (diluted 1:1 with buffer). TOSOH TSKgel Ultra SW Aggregate chromatography was performed using a  
170 buffer containing 100 mM sodium phosphate, 100 mM sodium sulphate at pH 6.7 at a flow rate of 1.0  
171 ml/min, and all samples (10 µl, BCF 1:20 dilution) were injected in triplicate.

172

173 ***Characterisation of CSF apoD by FPLC SEC***

174 CSF (250  $\mu$ l) was applied neat to the GE Superdex 200 Increase 10/300 column, which was equilibrated  
175 with 25 mM Tris, 150 mM NaCl, pH 8.0, at a flow-rate of 0.5 ml/min.

176

### 177 *Calibration of SEC columns and mass calculations*

178 SEC columns were equilibrated into the appropriate buffers (see above) and calibrated with an injection  
179 (Superdex 200: 250  $\mu$ l, TOSOH: 10  $\mu$ l) of SEC protein standard mix (Sigma) containing bovine  
180 thyroglobulin (670 kDa), bovine  $\gamma$ -globulins (150 kDa), chicken egg albumin (44.3 kDa) and bovine  
181 pancreas ribonuclease (13.7 kDa). The standard and sample peaks were integrated to determine the  
182 retention volume using ChromLab software (BioRad) or ChemStation (Agilent). The partition coefficient  
183  $K_{av}$  was calculated via the bed height and void volume of each column according to equation 1:

$$184 \quad K_{av} = \frac{V_e - V_0}{V_t - V_0} \quad \text{Equation 1}$$

185 with  $V_e$ : Elution volume,  $V_0$ : Void volume,  $V_t$ : total column volume.  $K_{av}$  and  $\text{Log}_{10}$  of the molecular  
186 weight in Da of each standard was plotted and fitted with a linear regression curve. Calculated error  
187 ranges were plotted. Using this standard curve, the molecular weights of the unknown samples were  
188 calculated.

189

### 190 *Protein Purification*

191 BCF fractions collected from the Superdex 200 16/600 SEC were characterised by SDS-PAGE, followed  
192 by Coomassie staining (G-250, SimplyBlue™ SafeStain) and western blotting. Fractions highly enriched  
193 in apoD (1 ml of each fraction covering eluate from 64.4 ml to 70.4 ml) were pooled, concentrated using  
194 Amicon Ultra concentrators with an Ultracel-10 membrane (10,000 Da molecular weight cut-off), and  
195 applied to the Superdex 200 10/300.

196 Hydrophobic interaction chromatography (HIC) purification of apoD was performed on a GE HiScreen  
197 Butyl-S FF column equilibrated into HIC buffer (50 mM sodium phosphate, 1.5 M ammonium sulphate,  
198 pH 7.0). BCF aliquots of 250  $\mu$ L were diluted into 15 ml of HIC buffer, applied to the column and then  
199 eluted with a 0–100% linear gradient using ultrapure water over 4 column volumes (CV).

200 Ion exchange (IEX) chromatography purification of apoD was performed on a GE HiTrap ANX™  
201 Sepharose FF 5 ml column equilibrated into IEX buffer (20mM piperazine, pH 5.0). BCF aliquots of 250  
202  $\mu$ L were applied to the column and eluted with a 0–50% gradient using high salt buffer (20 mM  
203 piperazine, 1 M NaCl, pH 5.0) over 4 CV.

204 IEX or HIC purified apoD fractions were identified by Coomassie SDS-PAGE, pooled, concentrated and  
205 buffer exchanged to 25 mM Tris, 150 mM NaCl, pH 8.0. Subsequently, apoD was purified in a polishing  
206 SEC step using the Superdex 200 16/600 column. Protein concentrations were measured using a

207 Nanodrop 2000c (ThermoFisher, Abs 280 nm,  $\epsilon = 32,680$ ) or a Pierce BCA assay (ThermoFisher) with  
208 bovine serum albumin (BSA) serial dilution as standard curve according to the manufacturer's  
209 instructions.

210

### 211 ***SDS-PAGE and western blotting***

212 Samples for SDS-PAGE were prepared by adding 4× sample buffer (Invitrogen) and DTT to a final  
213 concentration of 5  $\mu$ M, denatured for 10 min at 70°C and separated on 4-12% BOLT Bis-Tris SDS-  
214 polyacrylamide gels using MES running buffer (both Invitrogen) for 22 min at 200 V at 22°C. The gels  
215 were either stained using Coomassie staining (G-250, SimplyBlue™ SafeStain) or used for western  
216 blotting and immunodetection. SDS gels were either incubated in 20% (v/v) ethanol for 10 min and then  
217 transferred to 0.4  $\mu$ m PVDF membranes using the iBLOT semi-dry blotter (7 min programme P0) or  
218 transferred to 0.4  $\mu$ m PVDF for 1 h at 20 V using mini Blot modules (all Invitrogen). Post-transfer, the  
219 membranes were rinsed in reverse osmosis H<sub>2</sub>O, stained using Ponceau S (0.1% (w/v) in 5% acetic acid,  
220 Sigma) and then incubated in hot PBS for 10 min as an antigen-retrieval step. After blocking in PBS-10%  
221 Tween-20 (PBS-T) with 5% (w/v) skim milk powder for >1 h at 22°C, the membranes were probed for  
222 human apoD with monoclonal mouse anti-human apoD C1 antibody (1:5,000, Santa Cruz, SC-373965, lot  
223 G1911) in PBS-T with 5% (w/v) skim milk at 4°C overnight. Membranes were washed in PBS-T (1 min,  
224 then 3×5 min) and then incubated for 2 h at 22°C with polyclonal goat anti-mouse IgG conjugated to  
225 horseradish peroxidase (1:5,000, Dako, P0447, lot 00077665). After washing in PBS-T, the  
226 chemiluminescence signal was detected using Pierce ECL plus substrate (ThermoFisher) and a CCD  
227 imager (Amersham Imager 600RGB).

228

### 229 ***Blue and clear native PAGE***

230 BisTris NativePAGE running buffer and Tris-Glycine native buffer (Invitrogen) were prepared according  
231 to the manufacturer's instructions and 1% (v/v) NativePAGE cathode additive was added to BisTris  
232 NativePAGE buffer. Buffers were then chilled to 4°C. Samples were prepared by adding sample buffer to  
233 1× and then separated on 4-16% NativePAGE Bis-Tris gels (Invitrogen) for 90 min at 150 V or on 4-12%  
234 Novex Tris-Glycine gels (Invitrogen) for 60 min at 125 V, on ice. Gels were either stained using  
235 Coomassie staining (0.02% R-250 (w/v) in 10% (v/v) acetic acid, 40% (v/v) methanol, then destained in  
236 8% (v/v) acetic acid) or used for western blotting. Native gels were incubated in 2× transfer buffer with  
237 10% methanol for 10 min and then transferred to 0.4  $\mu$ m PVDF membranes using the iBLOT semi-dry  
238 blotter (7 min programme P0). Post-transfer, the membranes were incubated for 15 min in 8% acetic acid,  
239 rinsed in reverse osmosis H<sub>2</sub>O and then incubated in hot PBS for 10 min for antigen-retrieval. Membranes



240 were dried, reactivated in methanol and stained using Ponceau S. The immunodetection procedure was  
241 the same as described for SDS-PAGE but the apoD C1 antibody was used at a 1:1,000 dilution.

242

### 243 ***Crosslinking***

244 A 2 mg BS<sup>3</sup> aliquot (bis(sulfosuccinimidyl)suberate, ThermoFisher) was equilibrated to 22°C and  
245 dissolved immediately before use in ultrapure water to a concentration of 50 mM. Crosslinking was  
246 performed on BCF and IEX-purified apoD tetramer in parallel, at a final apoD concentration of 10 µM  
247 and final volume of 200 µl (BCF) or 50 µl (purified apoD). Samples were prepared in conjugation buffer  
248 (100 mM sodium phosphate, 150 mM NaCl, pH 7) and BS<sup>3</sup> was added at 10 ×, 20 ×, 50 ×, 100 × and 200  
249 × molar excess. Samples were mixed 30 s in vortex mixer, centrifuged at 1000 × g for 1 min and  
250 incubated at 22°C for 30 min or 1 h. The reaction was quenched for 15 min by adding quenching buffer  
251 (1M Tris-HCl, pH 7.5) to a final concentration of 50 mM Tris, vortexed and spun. Appropriate sample  
252 volumes were removed, mixed with SDS-PAGE loading dye and reducing agent and analysed using SDS-  
253 PAGE western blot as described above. The bands intensity was quantified using ImageJ.

254

### 255 ***Analytical ultracentrifugation***

256 Sedimentation velocity experiments were performed on a Beckman Coulter XL-I analytical  
257 ultracentrifuge equipped with an An-Ti60 rotor; 400 µl of 0.08, 0.26, 0.4, 0.6 and 0.8 mg/ml HIC-purified  
258 apoD tetramer in 25 mM Tris with 150 mM NaCl at pH 8.0 were applied to the sample compartment of a  
259 double-sector centrepiece, with buffer in the reference compartment. The samples were centrifuged at  
260 50,000 rpm for 10 h at 20°C and protein sedimentation was detected using absorbance at 280 nm. Data  
261 analysis was conducted using SedFit (Schuck and Rossmanith, 2000) by fitting the data to a continuous  
262 sedimentation coefficient model [c(s)]. The resulting size distribution curves were then normalised to  
263 enable comparison of the curves at different apoD concentrations.

264

### 265 ***Multi-angle laser light scattering***

266 HIC-purified apoD (100 µl, 2 mg/ml) or IEX-purified apoD (80 µl, 7 mg/ml) were analysed using SEC  
267 (S200 10/300 on an Äkta system, equilibrated with 25 mM Tris with 150 mM NaCl at pH 8.0) with online  
268 MALLS, UV absorbance and refractive index detectors (Wyatt). UV, MALLS, and dRI data were  
269 collected and analysed using ASTRA™ software (Wyatt Technology), and molecular weight  
270 determinations were carried out according to the Debye-Zimm model using a dn/dc value of 0.1876 ml/g  
271 for apoD (calculated by SedFit based on primary sequence). A run with BSA (100 µl, 2 mg/ml) was used  
272 to align UV, light scattering and refractive index signal.

273

274 ***Crosslinking mass spectrometry (XL-MS)***

275 For detailed method description, see Supporting Information Methods. Briefly, for each crosslinking  
276 experiment, 17–50 µg of IEX- and HIC-purified ApoD at ~0.4–1.2 mg/mL was crosslinked using BS<sup>3</sup> and  
277 adipic acid dihydrazide (ADH) and 4-(4,6-dimethoxy-1,3,5-triazin-2-yl)-4-methylmorpholinium chloride  
278 (DMTMM). DMTMM crosslinking is a side-reaction in the ADH crosslinking experiment. Samples were  
279 then digested with trypsin. For the generation of the MS/MS search database, 2–3 µg of purified, non-  
280 crosslinked apoD was also prepared for LC-MS/MS using trypsin. Peptides were then separated using a  
281 C18AQ particles column (Dr Maisch GmbH HPLC) on a Dionex UltiMate 3000 UHPLC system  
282 (ThermoFisher Scientific). Mass analyses were performed using a Q-Exactive Plus mass spectrometer  
283 (ThermoFisher Scientific) and identified using MSconvert tool (Chambers et al., 2012) and the database  
284 search program Mascot (Matrix science). For the screening and evaluation of potential crosslinks, a  
285 default FDR of 5% was used and only peptides with scores  $\leq 1 \times 10^{-4}$  (Yang et al., 2012) were considered  
286 for further analyses. All spectra that met these criteria were also manually visually verified: only  
287 crosslinks with at least four fragment ions on both the alpha- and beta-chain peptide each and addressing  
288 the most abundant peaks in the spectrum were retained for further analyses. Crosslinks that fulfilled all  
289 these conditions were deemed unambiguous and high-confidence. Theoretical and experimental masses,  
290 peptide sequences and how many times a specific crosslink was detected can be found in Table S2.

291

292 ***Small angle X-ray scattering data collection and analysis***

293 SEC-SAXS data in co-flow mode was collected at the SAXS/WAXS beamline at the Australian  
294 Synchrotron, Melbourne, Australia. IEX- and SEC-purified apoD in SAXS-buffer (50 mM Na Phosphate,  
295 150 mM NaCl, 3% (v/v) glycerol, pH 7.4) was spin-concentrated (7.5 mg/ml, measured by BCA assay)  
296 and frozen at –80°C. Samples were thawed on ice and spun for 10 min at 16k × g before application of 50  
297 µl to the GE Superdex 200 5/150 column which was equilibrated to SAXS-buffer. SAXS parameters are  
298 described in Table S1. Primary data reduction was done in ScatterBrain (2.710), all other data analyses  
299 were performed using ATSAS package 2.8.2 or ATSAS online (SASREF and DAMMIN) (Franke et al.,  
300 2017). For buffer subtraction, 30 frames before protein elution were selected, averaged and subtracted  
301 from the averaged data. Some particle deposition on the capillary was noted in the buffer region impairing  
302 the buffer subtraction. Therefore, the first three points were omitted for Guinier analysis. Guinier,  
303 distance distribution and Kratky analyses were carried out using Primusqt. The molecular weight of the  
304 apoD tetramer was calculated using the Porod volume and  $I(0)$  (Petoukhov et al., 2012), using contrasts  
305 and partial specific volumes calculated using MULCh (Whitten et al., 2008).

306 To create models based on SAXS of the apoD tetramer, 21 conformations from a molecular dynamics  
307 simulation of monomeric apoD with modelled glycosylation (Oakley et al., 2012) were used as starting

308 models. Two SASREF runs were performed to model a tetramer against the experimental SAXS data  
309 with  $D_2$  symmetry (P222 in SASREF). To restrain the model, the four unambiguously inter-subunit BS<sup>3</sup>  
310 crosslinks identified in XL-MS were used with a maximum distance of 32 Å (*B2, B3, B4, B9*, Table 1).  
311 The maximum distance was set slightly longer than the theoretical maximum linker distance for BS<sup>3</sup> of 29  
312 Å to allow for conformational flexibility of sidechains, rearrangement during oligomerisation as well as to  
313 prevent the model becoming trapped in a conformation that it consistent with the cross-linking data, but  
314 inconsistent with the SAXS data. The 42 produced SASREF models were visually inspected for fulfilling  
315 the identified crosslinks, glycosylations interfering with the inter-subunit interface and obvious clashing  
316 of glycosylations as SASREF only applies penalties for C $\alpha$ -C $\alpha$  clashes (Petoukhov and Svergun, 2005).  
317 Two SASREF models were then chosen based on their subunit conformation and according to the  
318 evaluation of minimal steric clashing of glycosylations, glycosylation interference with the inter-subunit  
319 interface and satisfying the identified crosslinks that were not restrained.  
320 In parallel, the experimental SAXS data was used in DAMMIN with P222 symmetry to create 20 bead  
321 models in each run. DAMAVER was used for validation and averaging with no model rejected in run 1  
322 and two models rejected in run 2. Using the SUPALM, the filtered bead and SASREF models were  
323 aligned and then superimposed in PyMOL. The superimposed SASREF models and the filtered *ab initio*  
324 models were visually evaluated for how well they overlay.

325

### 326 *Deglycosylation of apoD*

327 IEX-purified apoD tetramer (0.05 µg) was deglycosylated using PNGase F (glycerol free, P0704L, New  
328 England BioLabs) either under denaturing or native conditions according to the manufacturer's protocol.  
329 For denaturing conditions, apoD tetramer was mixed with denaturing buffer, heated to 95°C for 5 min,  
330 then glyco buffer, NP-40 and 1 µl PNGase were added and the reaction was incubated for 1 h at 37°C.  
331 For native conditions, apoD was mixed with glyco buffer and 1.5 µl PNGase and the reaction was  
332 incubated for 15 h, 24 h or 48 h at 37°C. Control samples were treated the same but PNGase was  
333 substituted with ultrapure water. The complete sample volumes were analysed on denaturing SDS-PAGE  
334 and western blotting as described above, with the difference that protein was transferred to nitrocellulose  
335 membranes at 25 V for 90 min and detection was performed on Amersham X-ray films.

336

## 337 **RESULTS**

### 338 *Characterisation of apoD in three human body fluids*

339 Initial characterisation of apoD in plasma, BCF and CSF was undertaken by SDS-PAGE and western  
340 blotting, with sample dilutions optimised for equal signal intensity (Figure 2A). In BCF a single band at  
341 approximately 27 kDa was detected, indicative of an apoD monomer. A similar molecular weight was

342 observed for apoD in CSF, while apoD in plasma was slightly larger at approximately 30 kDa. In BCF, a  
343 second low abundance band at ~60 kDa was also immunoreactive to apoD antibody.

344 To assess potential oligomerisation of apoD in BCF, CSF and plasma, samples were analysed using blue  
345 native (BN) and clear native (CN) PAGE and western blotting (Figure 2B and C). Using BN PAGE, three  
346 major bands were detected in BCF at ~130 kDa, 70 kDa and 45 kDa. Above and below this molecular  
347 weight range, faint smeared bands were also observed. Furthermore, some apoD was present as high  
348 molecular weight aggregates in the gel loading well. In contrast, CN PAGE of BCF showed a single band  
349 at ~120 kDa, indicating an oligomeric apoD species. In CSF three bands were identified using BN PAGE,  
350 with the main band at ~30 kDa and additional bands at 60 kDa and 100 kDa. This band pattern was not  
351 present in CN PAGE, which showed bands around 600 kDa, 480 kDa and 300 kDa. In plasma, apoD in  
352 BN PAGE did not enter the separating gel, indicating a very high molecular mass. Plasma analysed on  
353 CN PAGE again showed an apoD band at a similarly high molecular weight, as well as some lower  
354 molecular weight apoD bands.

355 The results of BN PAGE provided a strong indication that apoD is not exclusively present as a monomer  
356 in BCF and CSF. Therefore, we analysed apoD oligomerisation in BCF and CSF in greater detail.

357 Four major protein bands were identified in BCF using SDS-PAGE Coomassie staining (Figure 2D,  
358 marked with \*). According to previous reports, BCF contains albumin (70 kDa), Zn- $\alpha$ 2-glycoprotein (44  
359 kDa), apoD (25 kDa) and prolactin-inducible protein (15 kDa) (Balbín et al., 1990; Balbín et al., 1991;  
360 Haagenen et al., 1979); it is noteworthy that the major bands observed in the stained gel were consistent  
361 with these four proteins. Western blotting again identified apoD as a predominant band at 27 kDa as well  
362 as a second low abundance band at 60 kDa (Figure 2D).

363 To further evaluate apoD oligomerisation in BCF, initial SEC characterisation of BCF was performed  
364 directly (<4 hr) after collection through application to a Superdex Increase 200 size exclusion  
365 chromatography column (10 mm×300 mm). According to the elution profile depicted in Figure 2E,  
366 samples of the main peaks 1-9 were analysed by SDS-PAGE with Coomassie staining (Figure 2F). The  
367 predominant protein peak to elute from the column was identified as mainly apoD (peak 3). The retention  
368 volume of peak 3 suggests a molecular mass of ~100 kDa, much larger than the theoretical ~25 kDa of a  
369 monomeric 169 amino acid, fully glycosylated apoD. Notably, bands at the apparent molecular weight of  
370 apoB-100 (515 kDa) or apoA-II (11 kDa) were not found at concentrations that are near stoichiometric  
371 relevance for apoD. This indicates that the elution volume is not due to an association of apoD with  
372 lipoprotein particles. Importantly, identical SEC results were obtained from fresh, non-frozen BCF as  
373 from frozen BCF.

374 Using the same SEC column, SEC analysis was also performed on CSF resulting in the elution profile  
375 shown in Figure 2G. No major peak at the exclusion volume (~8–10 ml) was detected, indicating no

376 dominant high-molecular weight complexes, which is in agreement with BN PAGE but not with CN  
377 PAGE. SDS-PAGE western blot analysis of fractions within the range of the apoD monomer and  
378 oligomers revealed that the major apoD fraction elutes at ~16.5 ml, corresponding to molecular weight of  
379 apoD monomer (Figure 2H). Longer exposure to the CCD camera also showed less abundant apoD at  
380 14.5 ml and 13 ml, which is consistent with the theoretical elution volume of apoD oligomers (Figure S1).  
381 The SEC analysis of CSF resembles the BN PAGE analysis but not the CN PAGE, since apoD was not  
382 detected in SEC fractions eluting at a corresponding elution volume for proteins larger than 200 kDa (data  
383 not shown).  
384

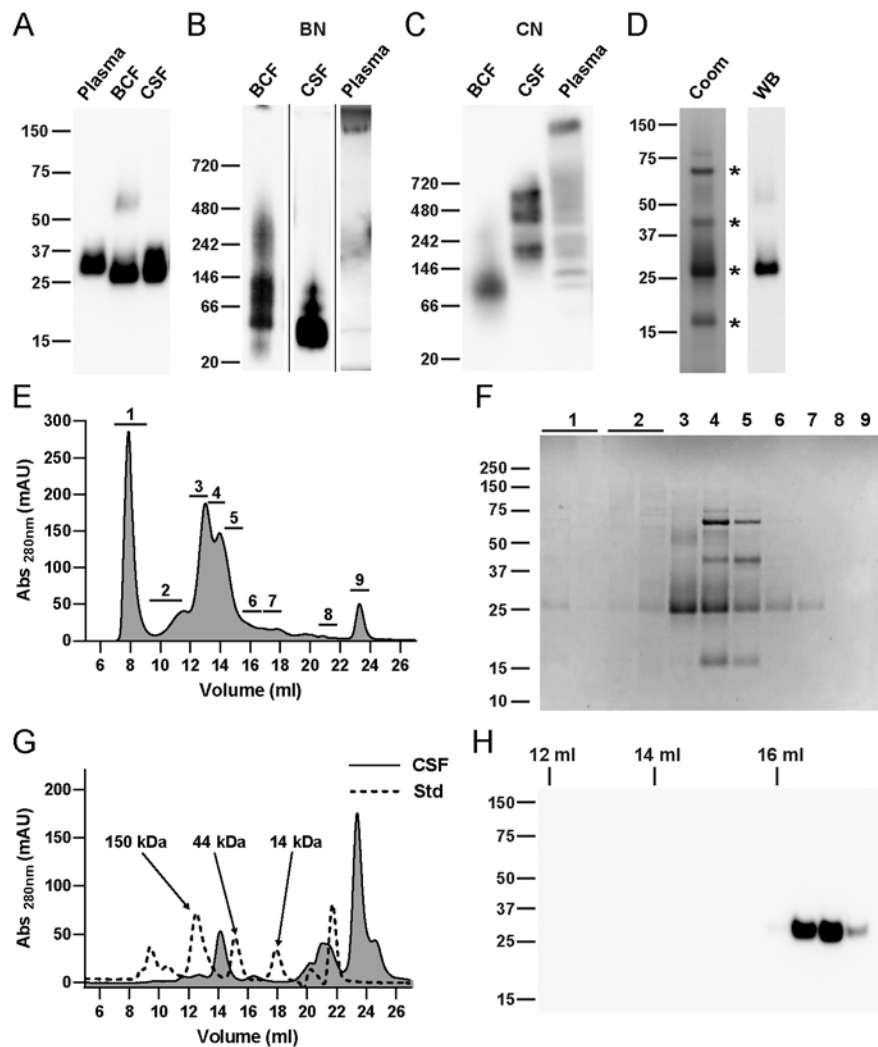

385

386 **Fig. 2.**

387

388 *Size-exclusion characterisation of apoD*

389 To improve chromatographic resolution of the BCF SEC analysis, BCF was next applied to a larger scale  
390 16 mm×600 mm (16/600) Superdex 200 column, calibrated using size standards (Figure 3A). Fractions  
391 over peak 1 and 2 were analysed by SDS-PAGE and probed for total protein by Coomassie staining and  
392 for apoD by western blotting (Figure 3B and C). The two main peaks eluted between 60 ml and 80 ml and  
393 represented the majority of the protein in BCF. The peak at 66 ml consisted exclusively of apoD at 27  
394 kDa (Figure 3B and C). Importantly, no band stoichiometric to the apoD amount was detected at 11 kDa  
395 indicative of apoA-II which apoD would associate with in lipoprotein particles. The second peak at 74 ml  
396 was a mixture of all four of the major BCF proteins, including a substantial amount of apoD. Western blot  
397 for apoD confirmed the 27 kDa protein as apoD, as well as small amounts of apoD at ~60 kDa, as  
398 observed in western blots of the original BCF prior to SEC analysis (Figure 2). Comparison of the elution  
399 profile to the profile of protein standards suggested that the main apoD peak eluted at a volume consistent  
400 with an oligomer of ~120 kDa.

401 Results from the large format S200 column confirmed the results obtained from BCF analysis on the  
402 small SEC column and from BN PAGE. Specifically, the predominant fraction of apoD eluted from the  
403 SEC column at a volume consistent with a hydrodynamic radius at least four-fold larger than expected of  
404 monomeric apoD. To validate this result, SEC fractions were then applied to BN PAGE and analysed  
405 both by Coomassie staining and western blotting (Figure 2D and E). Coomassie staining (Figure 2D)  
406 revealed two major bands: A protein of ~120–140 kDa in peak 1 and ~70 kDa protein in peak 2. When  
407 probed by western blot for apoD (Figure 2E), the 120 kDa band in peak 1 was the predominant band,  
408 accompanied by two less abundant bands that migrated further down the gel. The predominant 70 kDa  
409 band detected by Coomassie in peak 2 was not immunoreactive with the apoD antibody, which indicates  
410 that this band most likely consists of albumin. These results suggest that apoD in BCF predominantly  
411 forms a tetramer.

412

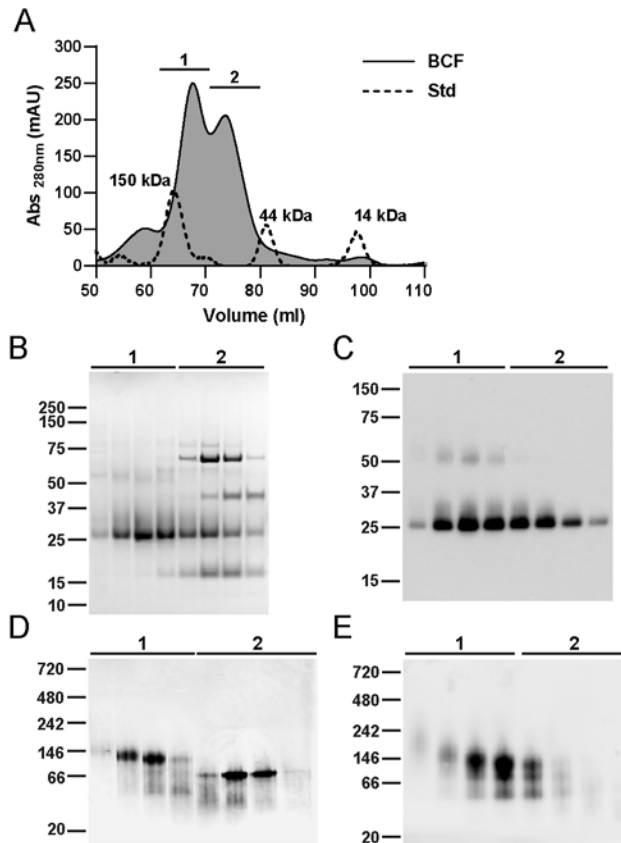

413

414 **Fig. 3.**

415

416 To ascertain if this putative tetrameric apoD species was in dynamic equilibrium with other apoD  
417 oligomeric species, S200 fractions containing the ~120 kDa apoD were pooled, concentrated and  
418 reapplied to size exclusion columns in both the 10/300 and 16/600 format. The SEC chromatogram from  
419 the 10/300 column is shown in Figure 4A. A single near-symmetric peak was observed with a retention  
420 volume consistent with the proposed tetrameric apoD observed in BCF. SEC fractions of the peak were  
421 analysed by SDS-PAGE with Coomassie staining. A distinct 27 kDa protein band was detected that was  
422 accompanied by a low abundance band at ~60 kDa (Figure 4B). Both bands were confirmed as apoD by  
423 western blotting (Figure 4C). The same fractions were further characterised by BN PAGE, Coomassie  
424 staining and western blot (Figures 4D and E). The predominant Coomassie band observed at ~120 kDa  
425 was confirmed as apoD by western blotting. Interestingly, BN PAGE again indicated two smaller protein  
426 species below the main 120 kDa band. This may indicate that the apoD tetramer dissociates due to sieving  
427 forces applied while migrating through the gel or due to the Coomassie dye acting as a light “detergent”  
428 (Wittig and Schagger, 2008).

429 For size determination of the putative apoD tetramer, calibrated SEC columns were used to extrapolate a  
430 molecular mass. Retention volumes for both apoD in BCF (Figure 3 peak 3) and purified apoD (Figure 4)  
431 from three different SEC column formats were obtained. In addition to the Superdex columns described  
432 above, an HPLC-based TOSOHC SEC column (~14 ml CV) was utilised. The HPLC column provided the  
433 ability to generate data in triplicate as well as confirm the Superdex SEC data with an alternative  
434 chromatographic media. Calibration curves and apoD results are shown in Figure S2. The S200 Increase  
435 10/300 was found to have the best statistical fit within the mass range of the size standards. The  
436 calculated apoD size for this column was 124 kDa (BCF apoD) and 131 kDa (purified apoD). Depending  
437 on column format and column matrix, the calculated molecular masses of the putative apoD tetramer  
438 ranged between 108 and 139 kDa.  
439

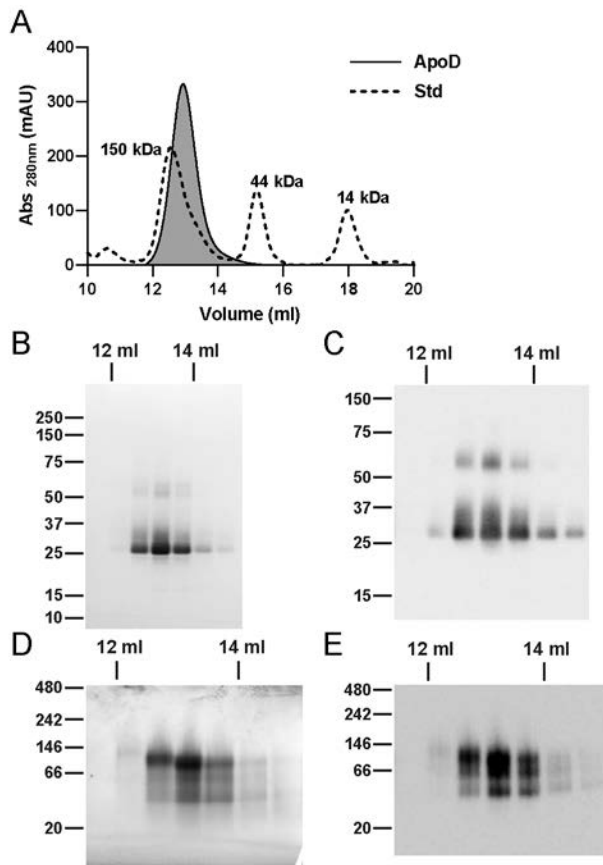

440  
441 **Fig. 4.**

442  
443 Purification of apoD by SEC alone did not yield in sufficient quantity and quality for further structural  
444 analyses. Therefore, we used two parallel purification strategies, an established IEX-purification and a  
445 novel HIC-purification, each with a subsequent SEC polishing step. To illustrate that these purification



446 strategies did not affect the oligomeric status of apoD, we compare the elution profiles of BCF to SEC-,  
447 IEX- and HIC-purified apoD (Figure S3). The SEC elution volume of fresh, not freeze-thawed BCF was  
448 consistent with SEC-purified apoD from frozen BCF and HIC-purified apoD (S200 10/300, Figure S3A).  
449 Furthermore, the SEC elution volume of BCF was consistent with IEX-purified apoD (S200 16/600,  
450 Figure S3B).

451

#### 452 *Crosslinking of apoD tetramer*

453 The molecular weight determination of apoD oligomer using BN PAGE and SEC provided useful  
454 approximate molecular mass values that were, however, variable to some degree. Therefore, we  
455 characterised the apoD tetramer with orthogonal and non-matrix based techniques including protein  
456 crosslinking, AUC and MALLS.

457 Crosslinking of the predominant putative apoD tetramer was performed by crosslinking primary amines  
458 using bis(sulfosuccinimidyl)-suberate (BS<sup>3</sup>). The linker arm of BS<sup>3</sup> is 11.4 Å long when fully extended,  
459 allowing a theoretical maximum distance of ~29 Å between α-carbons of crosslinked residues (Merkley et  
460 al., 2014). Crosslinking was performed with both BCF and purified tetrameric apoD for 30 min and 1 h.  
461 Crosslinked samples were analysed by SDS-PAGE and western blotting. Figure 5A shows the western  
462 blot for crosslinking for 30 min (identical results were obtained after 1 h of crosslinking and are shown in  
463 Figure S4). For crosslinking of BCF and purified apoD, an immunoreactive band at 100–110 kDa was  
464 detected with increasing molar excess of crosslinker. Bands at ~27 kDa, 50–55 kDa and 75 kDa were  
465 detected, depending on the BS<sup>3</sup> concentration. This result indicates that apoD forms a tetramer of ~100  
466 kDa, which is captured with increasing BS<sup>3</sup> amounts. Partially crosslinked tetramer dissociates to  
467 monomeric, dimeric and trimeric apoD (27, ~50 and 75 kDa) on SDS-PAGE. Nonspecific crosslinked  
468 products (i.e. with other proteins in BCF or very high molecular weight apoD species above the tetramer)  
469 were not detected. Quantification of crosslinking western blots showed an increase in apoD tetramer with  
470 increasing BS<sup>3</sup> concentrations for both BCF and purified apoD (Figure 5B and C). This crosslinking  
471 experiment confirms the nature of the apoD oligomer as a tetramer.

472

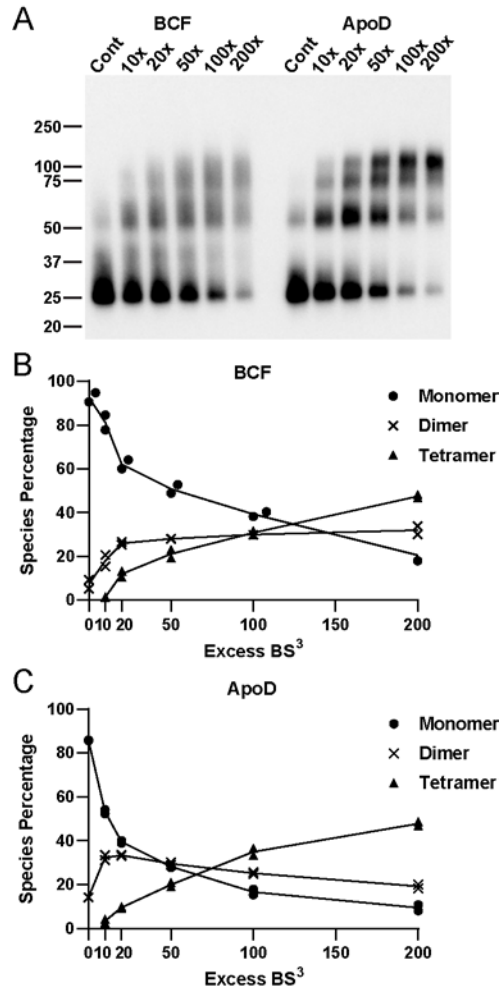

473

474 **Fig. 5.**

475

#### 476 *Multi-angle laser light scattering (MALLS) analysis*

477 For further verification of the apoD tetramer molecular weight, we applied HIC- and IEX-purified apoD  
478 tetramer to a Superdex S200 10/300 column combined with MALLS (SEC-MALLS). From SEC-MALLS  
479 (Figure 6A) a single, near-symmetrical peak of apoD eluted at a volume corresponding to a tetramer,  
480 consistent with the initial SEC characterisation (Figure 3). The observed experimental molecular weight  
481 of apoD, weight-averaged from three separate runs, was  $93.6 \pm 3.7$  kDa which is consistent with an apoD  
482 tetramer. Interestingly, the MALLS analysis indicated a molecular weight ranging from 110 kDa to 85  
483 kDa over the elution peak and the light scattering signal slightly preceded the UV and differential  
484 refractive index measurement (Figure 6A). This shift in the light scattering signal can indicate that the  
485 apoD peak may not be entirely homogeneous, e.g. due to varying degrees of apoD glycosylation. This  
486 was tested by SDS-PAGE western blot analysis of collected MALLS fractions which demonstrated  
487 consistent apparent molecular weight of the monomer units within the apoD tetramer (Figure 6B).

488 Therefore, the apparent heterogeneity of apoD tetramer based on the light scattering profile and the  
489 observed range of molecular sizes is not due to differences in gross glycan content.

490

491 ***Analytical ultracentrifugation analysis of apoD tetramer***

492 Sedimentation velocity by analytical ultracentrifugation (AUC) was utilised to further confirm the  
493 oligomeric state of apoD and identify a potential dynamic equilibrium between different oligomeric  
494 species upon dilution. The extensive glycosylation of apoD made precise determination of molecular  
495 weight by sedimentation equilibrium unfeasible as detailed below.

496 Sedimentation velocity of tetrameric apoD was measured at a range of apoD concentrations from 0.08  
497 mg/ml to 0.8 mg/ml and the normalised distribution of sedimentation coefficients is shown in Figure 6C.  
498 ApoD tetramer showed a predominant peak at a weight-average sedimentation coefficient of  $4.9 \pm 0.630$   
499 S. This corresponds to a molecular weight of roughly 85 kDa assuming a globular, non-glycosylated  
500 protein. The broadness of the apoD peak and the deviation in molecular mass (as compared to the SEC  
501 and PAGE techniques described above) may be due to the extensive glycosylation of apoD that makes the  
502 protein more buoyant (Lebowitz et al., 2002). Upon dilution, apoD tetramer remained stable, however,  
503 when apoD concentration was decreased to 0.08 mg/ml, a small fraction (~6%) of apoD was detected at a  
504 sedimentation coefficient of 2.4 S. This agreed with the sedimentation coefficient of HIC-purified apoD  
505 monomer (data not shown), corresponding to a molecular weight of around 26.5 kDa, matching an apoD  
506 monomer.

507

508

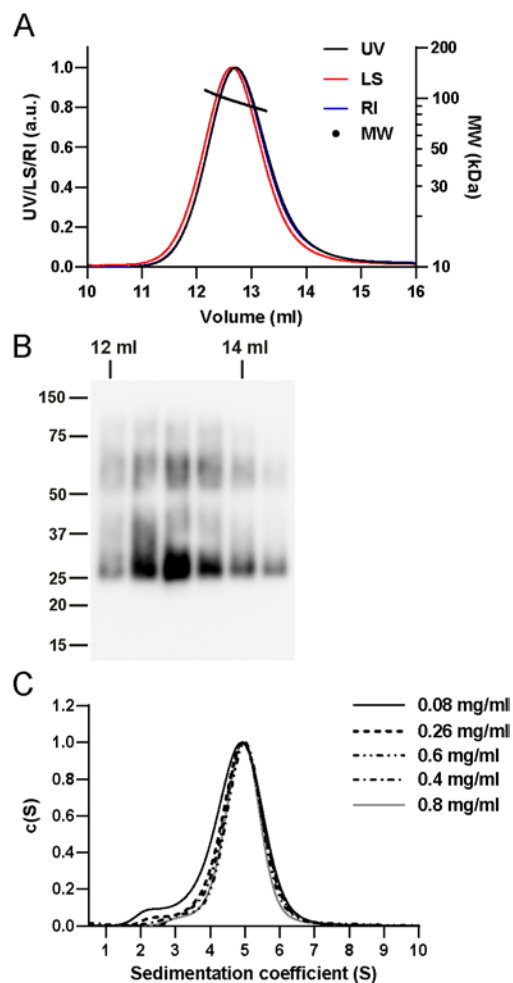

509

510 **Fig. 6.**

511

### 512 *SEC-Small-angle X-ray scattering (SEC-SAXS)*

513 Considering our results indicating a novel native tetrameric form of apoD, size-exclusion coupled with  
514 small angle X-ray scattering (SEC-SAXS) was applied to purified tetrameric apoD. SEC was utilised to  
515 remove traces of aggregates in-line prior to SAXS analysis. Freeze-thawing and glycerol in the SEC  
516 buffer to avoid radiation damage were shown by SEC to not affect the oligomeric status of apoD (Figure  
517 S3). All SAXS experimental and calculated parameters are presented in Table S1. Post-collection analysis  
518 of the radius of gyration ( $R_g$ ) and scattering intensity  $I(0)$  over the SEC peak determined the region of  
519 constant  $R_g$  for averaging and further analysis (marked in red, Figure 7A). After averaging and buffer  
520 subtraction, the data was evaluated in the Guinier region (Figure 7B). The data at small  $q$  values did not  
521 show any up- or down-turn. Together with the  $R_g$  stability over time in the selected, averaged region, this  
522 indicates no aggregation or interparticle repulsion. The SAXS intensity profiles  $I(q)$  versus  $q$  for  
523 experimental values (yellow) and two rigid body models (SASREF model 1, orange and 2, cyan) are

524 shown in Figure 7C. All experimental and calculated parameters are listed in Table S1. For the  
 525 experimental values, the  $I(q)$  versus  $q$  profile was transformed to a  $P(r)$  function shown in Figure 7D.  $P(r)$   
 526 corresponds to the probable distribution of vector lengths ( $r$ ) between scattering centres within the  
 527 scattering molecule and can be used to determine approximate shape and size of scattering molecules. The  
 528  $P(r)$  profile of tetrameric apoD corresponded to a globular shaped molecule, with a Porod volume of  
 529  $169000 \text{ \AA}^3$ . Based on the Porod volume, apoD molecular weight was estimated to be 99 kDa. This is in  
 530 good agreement with molecular weight determination based on  $I(0)$  which is 97.1 kDa. Therefore, SEC-  
 531 SAXS of oligomeric apoD further supports the tetrameric state of apoD. Additionally, the Kratky plot in  
 532 Figure S5A showed a bell-shaped curve indicating that the apoD tetramer has a globular shape.  
 533

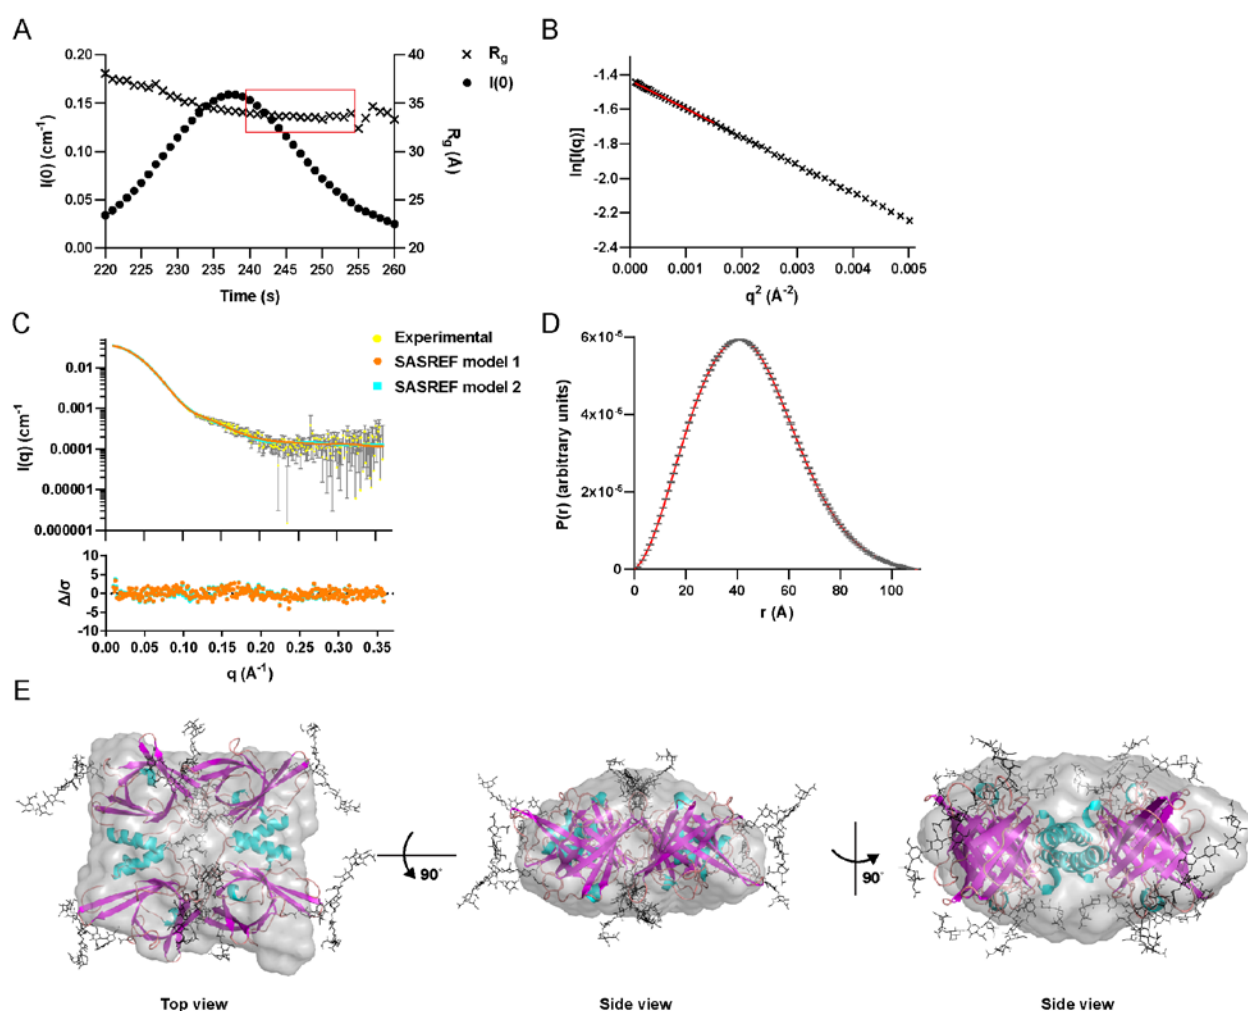

534  
 535 **Fig. 7.**

536  
 537  
 538

539 **Chemical crosslinking and mass spectrometry (XL-MS)**

540 To gain more insight into the tetrameric structure of apoD, we utilised XL-MS to obtain distance  
 541 information. Purified apoD was crosslinked with either BS<sup>3</sup> (crosslinks primary amines), ADH (crosslinks  
 542 carboxylic acids) or DMTMM, a side-reaction in the ADH crosslinking experiment, which crosslinks  
 543 primary amines to carboxylic acids. DMTMM catalysed reactions will be referred to as ‘ZLXL’ (zero-  
 544 length crosslinks) from here on. The use of crosslinkers with varying reactivities serves to enhance the  
 545 dataset by providing complementary orthogonal data. Briefly, in the XL-MS workflow, the protein  
 546 samples were crosslinked, digested to peptides, then crosslinked peptides were enriched via SEC, and  
 547 finally analysed by high-resolution LC-MS/MS. Crosslinked peptides were identified from the MS/MS  
 548 data by pLINK software (Yang et al., 2012). Only crosslinks that were unambiguously identified with  
 549 high confidence were used in subsequent analyses (see Materials and Methods for conditions). From two  
 550 purified samples (6 crosslinking reactions), a total of 13 unique, unambiguous and high-confidence  
 551 crosslinks were obtained. We observed 10 crosslinks from the BS<sup>3</sup> experiments and 3 crosslinks from the  
 552 ZLXL experiments. No crosslinks were identified using the ADH crosslinker. The identified crosslinks  
 553 are listed in Table 1 and their respective MS spectra are shown in Figure S6.

554 Out of these 13 crosslinks, four crosslinks (Table 1, crosslinks *B2*, *B3*, *B4* and *B9*) were found to be  
 555 unambiguously inter-subunit. This was based on the observation that the crosslink was either identified  
 556 between identical residues (*B2*: K55–K55 and *B3*: K156–K156) or between residues derived from  
 557 peptides with overlapping sequences (*B4*: peptide 1 (residues 156–169) crosslinked to peptide 2 (residues  
 558 145–156), and *B9*: peptide 1 (residues 132–156) crosslinked to peptide 2 (residues 156–167)). For these  
 559 crosslinks to occur, the peptides must have originated from two apoD monomers. In addition, three  
 560 crosslinks (Table 1, crosslinks *B7*, *Z2* and *Z3*) were also noted to be possibly inter-subunit crosslinks  
 561 rather than intra-subunit; the measured intra-subunit crosslinker lengths for these three crosslinks exceed  
 562 the theoretical length of the crosslinker.

563

564 **Table 1. All crosslinks identified in this study.**

| ID        | Cross-linker    | Residue         |                 | C-C Distance between residues (Å) <sup>†</sup> |         |               |         |
|-----------|-----------------|-----------------|-----------------|------------------------------------------------|---------|---------------|---------|
|           |                 | 1 <sup>st</sup> | 2 <sup>nd</sup> | Intra-subunit                                  |         | Inter-subunit |         |
|           |                 |                 |                 | Model 1                                        | Model 2 | Model 1       | Model 2 |
| <i>B1</i> | BS <sup>3</sup> | K21             | K55             | 14.0                                           | 13.6    | 35.0          | 25.7    |
| <i>B2</i> | BS <sup>3</sup> | K55             | K55             | -                                              | -       | 27.2          | 25.7    |
| <i>B3</i> | BS <sup>3</sup> | K156            | K156            | -                                              | -       | 25.5          | 27.0    |
| <i>B4</i> | BS <sup>3</sup> | K156            | K155            | -                                              | -       | 22.3          | 29.8    |
| <i>B5</i> | BS <sup>3</sup> | K167            | K55             | 21.3                                           | 23.6    | 16.3          | 47.7    |

|            |                 |      |      |      |      |      |      |
|------------|-----------------|------|------|------|------|------|------|
| <i>B6</i>  | BS <sup>3</sup> | K167 | K155 | 30.1 | 32.0 | 25.6 | 33.4 |
| <i>B7</i>  | BS <sup>3</sup> | K155 | K55  | 32.1 | 31.4 | 35.4 | 36.1 |
| <i>B8</i>  | BS <sup>3</sup> | K144 | K7   | 23.4 | 21.9 | 29.5 | 34.7 |
| <i>B9</i>  | BS <sup>3</sup> | K144 | K156 | -    | -    | 14.9 | 16.7 |
| <i>B10</i> | BS <sup>3</sup> | K7   | K156 | 20.7 | 20.0 | 34.6 | 23.7 |
| <i>Z1</i>  | ZLXL            | E71  | K55  | 7.4  | 7.5  | 21.9 | 26.8 |
| <i>Z2*</i> | ZLXL            | K55  | E30  | 22.6 | 22.7 | 32.5 | 38.3 |
| <i>Z3*</i> | ZLXL            | K155 | E60  | 25.2 | 24.2 | 25.2 | 26.1 |

565 Note: † Distances stated here are as measured in the proposed tetrameric apoD model. \* Not satisfied  
566 crosslinks.

567

### 568 ***SEC-SAXS modelling***

569 To further our structural understanding of tetrameric apoD, we applied an *ab initio* modelling approach  
570 using DAMMIN to produce low-resolution shapes with P222 symmetry for the tetrameric structure based  
571 on the SAXS data. The two filtered models are shown in Figure S5 B and exhibit no major differences in  
572 shape (model 1, orange: Normalised spatial discrepancy (NSD) =  $1.315 \pm 0.077$ ; model 2, cyan: NSD =  
573  $1.203 \pm 0.105$ ).

574 In parallel, monomeric models of apoD high-resolution X-ray structure (Eichinger et al., 2007) with  
575 different modelled glycosylation conformations (Oakley et al., 2012) were used as rigid bodies for  
576 SASREF modelling. We assumed a D<sub>2</sub> symmetry since D<sub>2</sub> is a very common symmetry for a tetramer  
577 (Goodsell and Olson, 2000). A C<sub>4</sub> symmetry is another possible symmetry for a tetramer, however,  
578 models with C<sub>4</sub> symmetry had a worse fit with the experimental scattering data ( $\chi^2 > 2.1$ , data not shown).  
579 We chose the unambiguously inter-subunit BS<sup>3</sup> crosslinks *B2*, *B3*, *B4* and *B9* as restraints in the  
580 modelling of the apoD tetramer, as BS<sup>3</sup> crosslinking was also experimentally tested to not introduce  
581 aggregation of apoD (Figure 5). Two rounds of SASREF modelling using all 21 glycosylation  
582 conformations (Oakley et al., 2012) were performed and the resulting models were visually evaluated and  
583 selected based on minimal steric clashing of glycosylations, glycosylation interference with the inter-  
584 subunit interface and satisfying the identified crosslinks that were not restrained.

585 Two global subunit conformations resulted from the modelling process. One representative model for  
586 each conformation was selected (SASBDB accession number: SASDD83) and the theoretical scattering is  
587 shown in Figure 7C (model 1: orange, model 2: cyan). The theoretical scattering of both models  
588 corresponds well with the experimentally determined scattering (model 1:  $\chi^2 = 1.28$ , model 2:  $\chi^2 = 1.26$ ).  
589 This agreement is also highlighted by the error-weighted residual difference plots ( $I_{\text{exp}}(q) - I_{\text{calc}}(q) / \sigma_{\text{exp}}(q)$ )

590 vs q) in the lower panel in Figure 7C: The residual plot shows a flat curve without pronounced deviation,  
591 including in the high q area.

592 Finally, the rigid-body tetramer models were structurally aligned with *ab initio* model 2 which produced a  
593 better overlay than *ab initio* model 1. The resulting overlay models for the apoD tetramer are shown in  
594 Figures 7E and S5C in top and side views. SASREF models are depicted as a cartoon showing  $\beta$ -sheets in  
595 pink,  $\alpha$ -helices in cyan and loops in tan, with glycosylations in black, the *ab initio* model is shown in a  
596 grey surface representation. The distances measured in the models for all XL-MS identified crosslinks can  
597 be found in Table 1. Both models fulfilled all BS<sup>3</sup> crosslinks and the inter-subunit BS<sup>3</sup> crosslinks were  
598 identified between symmetric and asymmetric subunits. This fits the finding of a partially crosslinked  
599 apoD tetramer which dissociated to a trimer on SDS-PAGE (Figure 5).

600 In SASREF model 1, the ligand binding pocket of apoD was facing outwards and accessible to ligands  
601 (Figure 7E). This conformation was obtained in approximately 75% of all models. The tetramer was built  
602 of antiparallel stacked  $\beta$ -barrels and stacked adjacent  $\alpha$ -helices. The inter-subunit interface of model 1  
603 consisted of stacked adjacent  $\alpha$ -helices and some parts of the  $\beta$ -barrel and their loops. The *ab initio* and  
604 rigid-body model overlaid well (NSD = 1.6813). Minor deviations were found in flexible regions such as  
605 glycosylations, loops and parts of  $\beta$ -sheets. In comparison, in SASREF model 2, the orientation of the  
606 ligand binding pocket was substantially different (Figure S5C). The  $\beta$ -barrels of the subunits were facing  
607 towards each other and appear inaccessible to ligands. The subunit-interface consisted of loops between  
608  $\beta$ -sheets. Again, the *ab initio* and rigid-body model overlaid well (NSD = 1.7155). Minor deviations were  
609 found in glycosylations, loops and parts of  $\beta$ -sheets. Interestingly, in both models, the four redox-active  
610 M93 side chains were fairly exposed and accessible. This is consistent with their previously described  
611 antioxidant activity that is due to interaction with L-OOHs (Bhatia et al., 2012b).

612

## 613 **DISCUSSION**

614 Oligomerisation is a common feature in the lipocalin family that can influence ligand binding behaviour  
615 in some lipocalins (Gamiz-Hernandez et al., 2015; Gutierrez-Magdaleno et al., 2013). ApoD, however,  
616 has been generally considered as a monomer (Akerstrom et al., 2000) but is known to dimerise upon  
617 reducing peroxidised lipids (Bhatia et al., 2012a). Here, we show that apoD is mainly present as a  
618 tetramer in BCF and that apoD oligomerisation may also take place in CSF.

619 ApoD was detected at slightly different apparent molecular weights in plasma, BCF and CSF on SDS-  
620 PAGE western blots (Figure 2A). This is most likely the result of differential apoD glycosylation, which  
621 is known to depend on the tissue location of apoD expression (Li et al., 2016; Schindler et al., 1995; Zeng  
622 et al., 1996). BN PAGE revealed oligomeric apoD species in BCF and CSF, whereas in plasma, apoD  
623 was detected at a very high molecular weight, as confirmed by CN PAGE (Figure 2). This is consistent



624 with the previously described association of apoD with HDL particles in plasma (Blanco-Vaca et al.,  
625 1992). In CSF, BN PAGE and SEC indicated the presence of oligomeric apoD, whereas with CN PAGE,  
626 apoD was found in higher molecular weight apoD bands (Figure 2). This suggests that apoD monomer  
627 and oligomer may be associated with small lipoprotein particles in CSF and that this association  
628 dissipates upon BN PAGE and with SEC. ApoD has been previously shown to associate with lipoproteins  
629 in CSF, more specifically with particles containing apoE, apoA-I and -IV, apoJ and apoH, and with larger  
630 particles containing apoE, apo-IV and apoJ (Koch et al., 2001). In this previous publication (Koch et al.,  
631 2001), SEC on CSF was performed and apoD was shown to co-elute with apoE in the major lipoprotein  
632 peak, as well as to elute later, together with apoA-IV. Unfortunately, elution volumes and calibrations  
633 were not reported. In the present study we used non-concentrated CSF, whereas Koch and co-workers  
634 used 100-fold concentrated CSF (Koch et al., 2001). These differences in purification and concentration  
635 techniques applied could account for differences in apoD oligomeric states detected.

636 In BCF, the main apoD species detected by native PAGE and SEC was an apoD oligomer of around 120  
637 kDa (Figures 2-4). Whereas HDL, LDL and VLDL have been shown to be present in BCF (Mannello et  
638 al., 1996; Martinez et al., 1994), we did not find stoichiometric relevant amounts of apoA-II or apoB-100  
639 in the relevant SEC fractions (Figure 2-4). Furthermore, neither apoB-100 nor apoA-II were identified  
640 using shotgun LC-MS/MS which was performed in conjunction with XL-MS. This indicates that the  
641 elution volume of 120 kDa is not due to association of apoD with lipoprotein particles but a result of  
642 oligomerisation. BCF is a fluid produced by benign cysts of the breast which are usually not cancerous  
643 (Mannello et al., 2006). Therefore, apoD oligomerisation most likely is not a result of tumourigenesis in  
644 breast cysts and may also occur under normal healthy conditions in CSF.

645 Using SEC and native PAGE to determine the molecular weight of oligomeric apoD, we noticed that  
646 these methods created some degree of ambiguity. Size determination on SEC showed variability  
647 depending on the column format and column media (Figure S2). This made identification of the exact  
648 composition of the apoD oligomer difficult. The observed variation may be due to the extensive  
649 glycosylation of apoD, which leads to a different retention of apoD on matrix-based SEC and PAGE  
650 compared with non-glycosylated size standards (Andrews, 1965). Indeed, sialylated proteins are known to  
651 elute earlier from SEC columns than expected for their actual molecular weight (Alhadef, 1978). Native  
652 PAGE proved to be a valuable tool to assess oligomerisation in fluids with low apoD concentrations, such  
653 as plasma and CSF but was not precise enough to detect the exact oligomeric status of apoD. This can be  
654 due to the fact that in clear native PAGE retention is influenced by charge in addition to molecular  
655 weight. Interestingly, purified apoD tetramer on BN PAGE resulted in three bands (Figures 3 and 4, D  
656 and E), indicating that the tetramer dissociated into dimers and monomers. This behaviour could be  
657 explained by Coomassie dye acting as a mild “detergent”, which can cause complexes to dissociate.

658 Coomassie especially covers hydrophobic areas (Wittig and Schagger, 2008), of which apoD contains  
659 several in extended loops (Eichinger et al., 2007). Our experiments investigating the oligomerisation of a  
660 native, glycosylated protein underline the importance of using several complementary methods for  
661 studying the molecular weight of protein complexes.

662  
663 To extend the data derived from SEC and native PAGE, we used protein crosslinking, MALLS and AUC  
664 as non-matrix based techniques for molecular weight determination of the apoD oligomer (Figures 5 and  
665 6). All three techniques showed that the apoD oligomer is in fact a tetramer of ~95 – 100 kDa. This is  
666 remarkable since apoD has so far been considered monomeric and to dimerise upon oxidation of M93.  
667 Our data show for the first time that apoD displays oligomerisation behaviour similar to other lipocalins.  
668 Three proteins that are apoD homologues, or share sequence homology with apoD, form oligomers.  
669 Lazarillo, the apoD homologue in the grasshopper *Schistocerca Americana* forms oligomers (30%  
670 sequence identity), as shown by SEC (Sanchez et al., 2008). Bilin-binding protein from the butterfly  
671 *Pieris brassicae* forms a tetramer, as shown by X-ray crystallography (Huber et al., 1987b).  
672 Sandercyanin, an apoD homologue in the North American fish *Sander vitreus* (42% sequence identity),  
673 was shown by X-ray crystallography to form a tetramer upon ligand binding (Ghosh et al., 2016). In the  
674 light of the prevalence of oligomerisation in the lipocalin family and the uncertainty of the oligomeric  
675 status of some lipocalins (Akerstrom et al., 2000), the case of apoD emphasises the usefulness of  
676 reviewing the potential oligomerisation of other lipocalins.

677 Furthermore, controversies over the oligomeric status of certain lipocalins have been attributed to  
678 differences in methodological approaches and recombinant cloning strategies (Gasymov et al., 2007;  
679 Schiefner et al., 2010). It is noteworthy that the monomeric recombinant apoD used for crystallisation was  
680 not glycosylated and contained seven point mutations to allow purification and crystallisation (Nasreen et  
681 al., 2006). This discrepancy between the oligomeric state of recombinant and native protein underscores  
682 the value of using native protein and employing multipronged approaches when studying protein structure  
683 and oligomerisation. Our experiments also highlight the importance of the apoD glycosylation which,  
684 intriguingly, depends on the tissue location of expression (Li et al., 2016; Schindler et al., 1995; Zeng et  
685 al., 1996). We were unable to fully deglycosylate the apoD tetramer under native conditions even after 48  
686 h (Figure S7). Additionally, the mutated side chains were not located in the ligand binding pocket but on  
687 exposed hydrophobic patches (I118S, L120S, C116S) or on the exposed bottom of pocket (L23P)  
688 (Eichinger et al., 2007). These changes on the surface may therefore influence self-association of apoD.

689 Whereas BN PAGE and SEC-MALLS pointed to a potential dissociation of the apoD tetramer, apoD  
690 seemed fairly stable upon ten-fold dilution in AUC, with only slight dissociation detected. This  
691 potentially indicates a low  $K_D$  value for the apoD tetramer in a concentration-dependent, dynamic

692 equilibrium. Assessing this question further proved problematic due to detection limits of AUC, MALLS  
693 and SEC (absorbance measurements at 214 or 280 nm).

694 In other lipocalins, ligand binding (Gutierrez-Magdaleno et al., 2013) or pH (Mans and Neitz, 2004; Qin  
695 et al., 1998) have been shown to influence oligomerisation. Since ligand binding of apoD may play a role  
696 in inflammation and oxidative stress and, therefore, in AD due to binding to AA and other lipids (Bhatia  
697 et al., 2013; Phillis et al., 2006), apoD oligomerisation could potentially influence these functions and  
698 lead to differentiated behaviour of apoD. Recently, apoD was shown to protect vulnerable lysosomes  
699 from oxidative stress and was found to be located on the inside of lysosomes, where pH is low, and to  
700 maintain ligand binding (Pascua-Maestro et al., 2017). Therefore, it could be interesting in future to  
701 assess the oligomeric structure of intralysosomal apoD.

702 Our SAXS experiments further confirmed the presence of an apoD tetramer, with a calculated molecular  
703 weight of 99 kDa and proposed a globular structure (Figure 7 and S5). Additionally, we provide structural  
704 insight into the apoD tetramer. ApoD model 1 showed stacked antiparallel  $\beta$ -barrels and stacked adjacent  
705  $\alpha$ -helices and an accessible ligand pocket. In contrast, model 2 showed a different conformation, present  
706 in 25% of all models, with ligand pockets facing either each other (Figure S5). These orientations would  
707 influence the ligand binding function of the apoD tetramer substantially. Past experiments that used  
708 similar purification techniques for apoD demonstrated ligand binding behaviour of apoD from BCF (Ruiz  
709 et al., 2014). SAXS however, as a low-resolution technique, cannot definitely determine which subunit  
710 orientation is predominantly or exclusively present in the tetramer. Interestingly, in both models, the  
711 redox-active residue M93 and glycosylations are accessible for redox activity and recognition,  
712 respectively. Furthermore, the so-called 'spike', located at the bottom of the apoD ligand binding pocket,  
713 is exposed in both models. This area has been implicated in binding to basiginin, a potential receptor for  
714 apoD internalisation (Najyb et al., 2015).

715 In summary, our data revealed that apoD predominantly forms tetramers in BCF and that apoD  
716 oligomerisation also takes place in CSF. Our results may have implications for apoD ligand binding and  
717 antioxidant function in different tissues and further highlight the oligomerisation propensity of the  
718 lipocalin family.

719

## 720 **ACKNOWLEDGEMENTS**

721 Thanks to Kerry-Ann Rye for advice with protein crosslinking, to Timothy Ryan from the SAXS/WAXS  
722 beamline at the Australian Synchrotron, part of ANSTO, for help and advice with the SAXS experiments  
723 and analysis and to Ann Turnley for proof-reading. BG holds a fellowship from the NHMRC  
724 (FT110100249). Travel support for the SAXS experiments was granted by the Australian Synchrotron.

725

726 **Declarations of interest:** none

727

728 **Figure captions:**

729 **Fig.1. Overview of the experimental design.** A) – E) outline the experimental process and summarise  
730 the fluids and purified apoD samples used for procedures in this study.

731

732 **Fig. 2. Identification and characterisation of apoD in three human fluids.** A) Plasma, BCF and CSF  
733 SDS-PAGE western blot probed for apoD showed apoD at ~27 kDa in BCF and CSF. ApoD in plasma  
734 appeared slightly larger. Loading: Plasma: 22  $\mu$ l of 1:100; BCF: 22  $\mu$ l of 1:22,000; CSF: 22  $\mu$ l of 1:15. B)  
735 Blue native PAGE (BN) and western blotting of plasma, BCF and CSF revealed higher order apoD  
736 species. Loading: Plasma: 10  $\mu$ l of 1:67; BCF: 10  $\mu$ l of 1:322.5; CSF: 10  $\mu$ l of 1:2. C) Clear native PAGE  
737 (CN) and western blotting of plasma, BCF and CSF revealed higher order apoD species in BCF. Loading:  
738 Plasma: 8  $\mu$ l of 1:2.29; BCF: 8  $\mu$ l of 1:533; CSF: 8  $\mu$ l of 1:4. D) SDS-PAGE Coomassie staining (Coom)  
739 of BCF showed the four most abundant proteins (indicated by asterisks) in BCF (albumin, 70 kDa; Zn-  
740  $\alpha$ 2-glycoprotein, 44 kDa; apoD, 27 kDa; prolactin-inducible protein, 15 kDa). BCF western blot (WB)  
741 probed for apoD identified an abundant band at 27 kDa as apoD, as well as a potential dimer species at  
742 ~60 kDa. Loading: Coomassie: 1  $\mu$ l of 1:10; Western blot: 1  $\mu$ l of 1:133. E) Size exclusion (Superdex  
743 S200 Increase 10/300) UV trace from the direct application of BCF identified nine areas of interest  
744 (marked 1–9). F) SDS-PAGE Coomassie of the nine SEC fractions (loading volume 19.5  $\mu$ l eluate)  
745 marked in panel E indicated a high abundance of apoD in peak three. G) Size exclusion (Superdex S200  
746 Increase 10/300) UV trace from the direct application of CSF (unbroken line) and the UV trace of size  
747 standards (Std, dashed line). H) SDS-PAGE western blotting (short exposure time) of SEC fractions  
748 (loading volume 26  $\mu$ l eluate) collected in panel G with elution volume indicated. The major apoD  
749 portion was detected at 17 ml elution volume.

750

751 **Fig. 3. SEC characterisation of apoD in BCF.** Neat BCF applied to high-resolution SEC showed that  
752 apoD eluted as an oligomer. A) Size exclusion (Superdex S200 16/600) UV trace from the direct  
753 application of BCF (unbroken line) and the UV trace of size standards (Std, dashed line). Fractions of 1  
754 ml of eluate over peak 1 from 64.4 ml to 70.4 ml, were pooled and rerun on S200 10/300 (Figure 3). B)  
755 SDS-PAGE Coomassie staining (loading volume 19.5  $\mu$ l eluate) and C) western blotting (loading volume  
756 0.3  $\mu$ l eluate) of SEC fractions shown in panel A indicated pure apoD in peak 1. D) BN PAGE Coomassie  
757 staining (loading volume 30  $\mu$ l eluate, non-linear adjustment) and E) western blot (loading volume 3.75  
758  $\mu$ l eluate) of SEC fractions indicated in panel A showed high order apoD species, with the predominant  
759 band running at ~120 kDa.

760  
761 **Fig. 4. SEC characterisation of apoD purified from BCF.** Pooled SEC fractions containing apoD  
762 (Figure 2) were rerun on SEC and eluted as a single peak consistent with a hydrodynamic radius of a  
763 ~120 kDa protein. A) Size exclusion (Superdex S200 increase 10/300) UV trace from pooled and rerun  
764 apoD fractions (unbroken line) and the UV trace of size standards (Std, dashed line). B) SDS-PAGE  
765 Coomassie staining (loading volume 6.7  $\mu$ l eluate) and C) western blotting (loading volume 0.1  $\mu$ l eluate)  
766 of SEC fractions confirmed that the fractions contained pure apoD. D) Blue Native PAGE Coomassie  
767 staining (loading volume 30  $\mu$ l eluate) and E) western blot (loading volume 1  $\mu$ l eluate) of SEC fractions  
768 showed higher order apoD species, with the predominant band running at ~120 kDa.

769  
770 **Fig. 5. Crosslinking of apoD tetramer.** BCF and purified apoD tetramer were crosslinked with BS<sup>3</sup>  
771 using a molar crosslinker excess ranging from 10 $\times$  to 200 $\times$ . A) Crosslink reaction mixtures (loading  
772 volume 0.13  $\mu$ l sample of reaction, 0.03  $\mu$ g apoD) analysed by western blot after 30 min. With increasing  
773 crosslinker concentration, fully crosslinked apoD tetramer appeared at ~100 kDa. No higher size species  
774 or aggregates were detected. Cont: Control, no BS<sub>3</sub>. Quantification of crosslinking western blots for B)  
775 BCF and C) purified apoD tetramer demonstrated a decrease in monomers and an increase in tetramers  
776 corresponding with increasing BS<sup>3</sup> excess. Percentages of apoD species for 30 min and 1h of crosslinking  
777 (blot in Figure S4) are shown at each crosslinker concentration and the black lines connect the means of  
778 30 min and 1 h of crosslinking.

779  
780 **Fig. 6. SEC-Multi-angle laser light scattering and analytical ultracentrifugation analysis of apoD**  
781 **tetramer.** A) SEC-MALLS was performed on HIC- and IEX-purified apoD tetramer with recordings UV  
782 absorbance at 280 nm (UV, black line), light scatter (LS, red line), differential refractive index (RI, blue  
783 line) and calculated molecular weight (dots) (representative run). The calculated average molecular  
784 weight for the apoD tetramer was  $93.6 \pm 3.7$  kDa (three separate runs) and the molecular weight ranged  
785 from 110 kDa to 85 kDa over the peak. The light scattering signal slightly preceded the UV and refractive  
786 index signals. B) SDS-PAGE Coomassie staining of eluted fractions (loading volume 26  $\mu$ l eluate)  
787 revealed symmetrical apoD bands consistently at 27 kDa. C) Sedimentation velocity AUC was carried out  
788 with purified apoD tetramer at indicated concentrations and the distribution of sedimentation coefficients  
789 was determined. ApoD tetramer had a sedimentation coefficient of ~4.9 S and was relatively stable upon  
790 dilution. At a concentration of 0.08 mg/ml, small amounts of apoD monomer with a sedimentation  
791 coefficient of ~2.4 S could be detected.

792

793 **Fig. 7. SEC-SAXS analysis of apoD tetramer.** A) Scattering intensity  $I(0)$  (dots) and radius of gyration  
794  $R_g$  (crosses) over elution of apoD on the S200 5/150 SEC column identified the region for averaging  
795 (marked in red). B) Guinier plot of apoD tetramer and linear regression, indicating no up- or down-turn of  
796 the curve. C) Experimental scattering profile of apoD tetramer (yellow dots with grey error bars).  
797 Continuous lines represent the calculated scattering profiles of the two SASREF rigid-body models  
798 shown in panel D (model 1, orange rhomb,  $\chi^2 = 1.25$ ) and Figure S5 C (model 2, cyan square,  $\chi^2 = 1.44$ ).  
799 The lower inset plot shows the error-weighted residual  $\Delta/\sigma$  difference plot. D)  $P(r)$  function of apoD  
800 tetramer. The symmetric profile was indicative of a mainly globular scattering molecule. In panels C and  
801 D, errors are based on counting statistics and error bars are not shown if they are smaller than symbol  
802 sizes. E) Representative model of apoD tetramer generated by the combination of ab initio model 2 (grey)  
803 and rigid-body model 1 (cartoon showing  $\beta$ -sheets in pink,  $\alpha$ -helices in cyan and loops in tan, with  
804 glycosylations in black) is depicted in top and side views. The entry to the ligand binding site was facing  
805 outwards and seems accessible. The inter-subunit interface was comprised of stacked adjacent  $\alpha$ -helices  
806 and some parts of the  $\beta$ -barrel and their loops. The two models overlaid reasonably well, with some  
807 glycosylations, the end of two  $\beta$ -sheets and their loops protruding.

808

## 809 REFERENCES

- 810 Akerstrom, B., Flower, D.R., Salier, J.P., 2000. Lipocalins: unity in diversity. *Biochim Biophys Acta*  
811 1482, 1-8.
- 812 Alhadeff, J.A., 1978. Gel filtration of sialoglycoproteins. *Biochem J* 173, 315-319.
- 813 Andrews, P., 1965. The gel-filtration behaviour of proteins related to their molecular weights over a wide  
814 range. *Biochem J* 96, 595-606.
- 815 Balbín, M., Freije, J.M., Fueyo, a., Sánchez, L.M., López-Otín, C., 1990. Apolipoprotein D is the major  
816 protein component in cyst fluid from women with human breast gross cystic disease. *Biochem J*  
817 271, 803-807.
- 818 Balbín, M., Vizoso, F., Sánchez, L.M., Venta, R., Ruibal, A., Fueyo, A., López-Otín, C., 1991. GCDFP-  
819 70 protein in cyst fluid identified as albumin and used to classify cysts in women with breast  
820 gross cystic disease. *Clin Chem* 37, 547-551.
- 821 Bhatia, S., Knoch, B., Wong, J., Kim, W.S., Else, P.L., Oakley, A.J., Garner, B., 2012a. Selective  
822 reduction of hydroperoxyeicosatetraenoic acids to their hydroxy derivatives by apolipoprotein-D:  
823 Implications for lipid antioxidant activity and Alzheimer's disease. *Biochem J* 442, 713-721.
- 824 Bhatia, S., Knoch, B., Wong, J., Kim, W.S., Else, P.L., Oakley, A.J., Garner, B., 2012b. Selective  
825 reduction of hydroperoxyeicosatetraenoic acids to their hydroxy derivatives by apolipoprotein D:  
826 implications for lipid antioxidant activity and Alzheimer's disease. *The Biochemical journal* 442,  
827 713-721.
- 828 Bhatia, S., Jenner, A.M., Li, H., Ruberu, K., Spiro, A.S., Shepherd, C.E., Kril, J.J., Kain, N., Don, A.,  
829 Garner, B., 2013. Increased apolipoprotein D dimer formation in alzheimer's disease  
830 hippocampus is associated with lipid conjugated diene levels. *J Alzheimers Dis* 35, 475-486.
- 831 Blanco-Vaca, F., Pownall, H.J., 1993. Disulfide linked dimers of apolipoprotein D in urine.  
832 *Electrophoresis* 14, 1086-1087.

- 833 Blanco-Vaca, F., Via, D.P., Yang, C.Y., Massey, J.B., Pownall, H.J., 1992. Characterization of disulfide-  
834 linked heterodimers containing apolipoprotein D in human plasma lipoproteins. *J Lipid Res* 33,  
835 1785-1796.
- 836 Chambers, M.C., Maclean, B., Burke, R., Amodei, D., Ruderman, D.L., Neumann, S., Gatto, L., Fischer,  
837 B., Pratt, B., Egertson, J., Hoff, K., Kessner, D., Tasman, N., Shulman, N., Frewen, B., Baker,  
838 T.A., Brusniak, M.Y., Paulse, C., Creasy, D., Flashner, L., Kani, K., Moulding, C., Seymour,  
839 S.L., Nuwaysir, L.M., Lefebvre, B., Kuhlmann, F., Roark, J., Rainer, P., Detlev, S., Hemenway,  
840 T., Huhmer, A., Langridge, J., Connolly, B., Chadick, T., Holly, K., Eckels, J., Deutsch, E.W.,  
841 Moritz, R.L., Katz, J.E., Agus, D.B., MacCoss, M., Tabb, D.L., Mallick, P., 2012. A cross-  
842 platform toolkit for mass spectrometry and proteomics. *Nat Biotechnol* 30, 918-920.
- 843 Dilley, W.G., Haagensen, D.E., Cox, C.E., Wells, S.A., Jr., 1990. Immunologic and steroid binding  
844 properties of the GCDFP-24 protein isolated from human breast gross cystic disease fluid. *Breast*  
845 *Cancer Res Treat* 16, 253-260.
- 846 Eichinger, A., Nasreen, A., Kim, H.J., Skerra, A., 2007. Structural insight into the dual ligand specificity  
847 and mode of high density lipoprotein association of apolipoprotein D. *J Biol Chem* 282, 31068-  
848 31075.
- 849 Franke, D., Petoukhov, M.V., Konarev, P.V., Panjkovich, A., Tuukkanen, A., Mertens, H.D.T., Kikhney,  
850 A.G., Hajizadeh, N.R., Franklin, J.M., Jeffries, C.M., Svergun, D.I., 2017. ATSAS 2.8: a  
851 comprehensive data analysis suite for small-angle scattering from macromolecular solutions. *J*  
852 *Appl Crystallogr* 50, 1212-1225.
- 853 Gamiz-Hernandez, A.P., Angelova, I.N., Send, R., Sundholm, D., Kaila, V.R., 2015. Protein-Induced  
854 Color Shift of Carotenoids in beta-Crustacyanin. *Angew Chem Int Ed Engl* 54, 11564-11566.
- 855 Gasymov, O.K., Abduragimov, A.R., Merschak, P., Redl, B., Glasgow, B.J., 2007. Oligomeric state of  
856 lipocalin-1 (LCN1) by multiangle laser light scattering and fluorescence anisotropy decay.  
857 *Biochim Biophys Acta* 1774, 1307-1315.
- 858 Ghosh, S., Yu, C.L., Ferraro, D.J., Sudha, S., Pal, S.K., Schaefer, W.F., Gibson, D.T., Ramaswamy, S.,  
859 2016. Blue protein with red fluorescence. *Proc Natl Acad Sci U S A* 113, 11513-11518.
- 860 Goodsell, D.S., Olson, A.J., 2000. Structural symmetry and protein function. *Annu Rev Biophys Biomol*  
861 *Struct* 29, 105-153.
- 862 Gouveia, S.M., Tiffany, J.M., 2005. Human tear viscosity: an interactive role for proteins and lipids.  
863 *Biochim Biophys Acta* 1753, 155-163.
- 864 Gutierrez-Magdaleno, G., Bello, M., Portillo-Tellez, M.C., Rodriguez-Romero, A., Garcia-Hernandez, E.,  
865 2013. Ligand binding and self-association cooperativity of beta-lactoglobulin. *J Mol Recognit* 26,  
866 67-75.
- 867 Haagensen, D.E., Jr., Mazoujian, G., Dilley, W.G., Pedersen, C.E., Kister, S.J., Wells, S.A., Jr., 1979.  
868 Breast gross cystic disease fluid analysis. I. Isolation and radioimmunoassay for a major  
869 component protein. *J Natl Cancer Inst* 62, 239-247.
- 870 Holzfeind, P., Merschak, P., Dieplinger, H., Redl, B., 1995. The human lacrimal gland synthesizes  
871 apolipoprotein D mRNA in addition to tear prealbumin mRNA, both species encoding members  
872 of the lipocalin superfamily. *Exp Eye Res* 61, 495-500.
- 873 Huber, R., Schneider, M., Epp, O., Mayr, I., Messerschmidt, A., Pflugrath, J., Kayser, H., 1987a.  
874 Crystallization, crystal structure analysis and preliminary molecular model of the bilin binding  
875 protein from the insect *Pieris brassicae*. *J Mol Biol* 195, 423-434.
- 876 Huber, R., Schneider, M., Mayr, I., Muller, R., Deutzmann, R., Suter, F., Zuber, H., Falk, H., Kayser, H.,  
877 1987b. Molecular structure of the bilin binding protein (BBP) from *Pieris brassicae* after  
878 refinement at 2.0 Å resolution. *J Mol Biol* 198, 499-513.
- 879 Jacques, D.A., Guss, J.M., Svergun, D.I., Trewthella, J., 2012. Publication guidelines for structural  
880 modelling of small-angle scattering data from biomolecules in solution. *Acta Crystallogr D Biol*  
881 *Crystallogr* 68, 620-626.

- 882 Koch, S., Donarski, N., Goetze, K., Kreckel, M., Stuerenburg, H.J., Buhmann, C., Beisiegel, U., 2001.  
883 Characterization of four lipoprotein classes in human cerebrospinal fluid. *J Lipid Res* 42, 1143-  
884 1151.
- 885 Kozak, M., Grubb, A., 2007. SAXS studies of human protein HC (alpha1-microglobulin). *Protein Pept*  
886 *Lett* 14, 425-429.
- 887 Lea, O.A., 1988. Binding properties of progesterone-binding Cyst protein, PBCP. *Steroids* 52, 337-338.
- 888 Lebowitz, J., Lewis, M.S., Schuck, P., 2002. Modern analytical ultracentrifugation in protein science: a  
889 tutorial review. *Protein Sci* 11, 2067-2079.
- 890 Li, H., Ruberu, K., Karl, T., Garner, B., 2016. Cerebral Apolipoprotein-D Is Hypoglycosylated Compared  
891 to Peripheral Tissues and Is Variably Expressed in Mouse and Human Brain Regions. *PLoS One*  
892 11, e0148238.
- 893 Li, H., Ruberu, K., Muñoz, S.S., Jenner, A.M., Spiro, A., Zhao, H., Rassart, E., Sanchez, D., Ganfornina,  
894 M.D., Karl, T., Garner, B., 2015. Apolipoprotein D modulates amyloid pathology in APP/PS1  
895 Alzheimer's disease mice. *Neurobiol Aging* 36, 1820-1833.
- 896 Mannello, F., Tonti, G.A., Papa, S., 2006. Human gross cyst breast disease and cystic fluid: bio-  
897 molecular, morphological, and clinical studies. *Breast Cancer Res Treat* 97, 115-129.
- 898 Mannello, F., Bocchiotti, G.D., Morano, F.P., Fratapietro, L.M., Gazzanelli, G., 1996. Lipids status in  
899 human breast cyst fluids. *Cancer Lett* 98, 137-143.
- 900 Mans, B.J., Neitz, A.W., 2004. Molecular crowding as a mechanism for tick secretory granule biogenesis.  
901 *Insect Biochem Mol Biol* 34, 1187-1193.
- 902 Martinez, L., Castilla, J.A., Gil, T., Molina, J., Diaz, M.A., Mozas, J., Herruzo, A., 1994. Intracystic  
903 lipidic profile in fibrocystic breast disease. *Gynecol Endocrinol* 8, 287-292.
- 904 Merkley, E.D., Rysavy, S., Kahraman, A., Hafen, R.P., Daggett, V., Adkins, J.N., 2014. Distance  
905 restraints from crosslinking mass spectrometry: mining a molecular dynamics simulation database  
906 to evaluate lysine-lysine distances. *Protein Sci* 23, 747-759.
- 907 Morais Cabral, J.H., Atkins, G.L., Sanchez, L.M., Lopez-Boado, Y.S., Lopez-Otin, C., Sawyer, L., 1995.  
908 Arachidonic acid binds to apolipoprotein D: implications for the protein's function. *FEBS Lett*  
909 366, 53-56.
- 910 Najyb, O., Brissette, L., Rassart, E., 2015. Apolipoprotein D Internalization Is a Basigin-dependent  
911 Mechanism. *J Biol Chem* 290, 16077-16087.
- 912 Nasreen, A., Vogt, M., Kim, H.J., Eichinger, A., Skerra, A., 2006. Solubility engineering and  
913 crystallization of human apolipoprotein D. *Protein Sci* 15, 190-199.
- 914 Oakley, A.J., Bhatia, S., Ecroyd, H., Garner, B., 2012. Molecular dynamics analysis of apolipoprotein-D-  
915 lipid hydroperoxide interactions: mechanism for selective oxidation of Met-93. *PLoS One* 7,  
916 e34057.
- 917 Pascua-Maestro, R., Diez-Hermano, S., Lillo, C., Ganfornina, M.D., Sanchez, D., 2017. Protecting cells  
918 by protecting their vulnerable lysosomes: Identification of a new mechanism for preserving  
919 lysosomal functional integrity upon oxidative stress. *PLoS Genet* 13, e1006603.
- 920 Pearlman, W.H., Gueriguian, J.L., Sawyer, M.E., 1973. A specific progesterone-binding component of  
921 human breast cyst fluid. *J Biol Chem* 248, 5736-5741.
- 922 Petoukhov, M.V., Svergun, D.I., 2005. Global rigid body modeling of macromolecular complexes against  
923 small-angle scattering data. *Biophys J* 89, 1237-1250.
- 924 Petoukhov, M.V., Franke, D., Shkumatov, A.V., Tria, G., Kikhney, A.G., Gajda, M., Gorba, C., Mertens,  
925 H.D., Konarev, P.V., Svergun, D.I., 2012. New developments in the ATSAS program package for  
926 small-angle scattering data analysis. *J Appl Crystallogr* 45, 342-350.
- 927 Phillis, J.W., Horrocks, L.A., Farooqui, A.A., 2006. Cyclooxygenases, lipoxygenases, and epoxygenases  
928 in CNS: their role and involvement in neurological disorders. *Brain Res Rev* 52, 201-243.
- 929 Qin, B.Y., Bewley, M.C., Creamer, L.K., Baker, H.M., Baker, E.N., Jameson, G.B., 1998. Structural basis  
930 of the Tanford transition of bovine beta-lactoglobulin. *Biochemistry* 37, 14014-14023.
- 931 Ruiz, M., Ganfornina, M.D., Correnti, C., Strong, R.K., Sanchez, D., 2014. Ligand binding-dependent  
932 functions of the lipocalin NLaz: an in vivo study in *Drosophila*. *FASEB J* 28, 1555-1567.



- 933 Sanchez, D., Ortega-Cubero, S., Akerström, B., Herrera, M., Bastiani, M.J., Ganfornina, M.D., 2008.  
934 Molecular interactions of the neuronal GPI-anchored lipocalin Lazarillo. *J Mol Recognit* 21, 313-  
935 323.
- 936 Sánchez, L.M., Díez-Itza, I., Vizoso, F., López-Otín, C., 1992. Cholesterol and apolipoprotein D in gross  
937 cystic disease of the breast. *Clinical chemistry* 38, 695-698.
- 938 Schiefner, A., Chatwell, L., Breustedt, D.A., Skerra, A., 2010. Structural and biochemical analyses reveal  
939 a monomeric state of the bacterial lipocalin Blc. *Acta Crystallogr D Biol Crystallogr* 66, 1308-  
940 1315.
- 941 Schindler, P.a., Settineri, C.a., Collet, X., Fielding, C.J., Burlingame, a.L., 1995. Site-specific detection  
942 and structural characterization of the glycosylation of human plasma proteins lecithin:cholesterol  
943 acyltransferase and apolipoprotein D using HPLC/electrospray mass spectrometry and sequential  
944 glycosidase digestion. *Protein Sci* 4, 791-803.
- 945 Schuck, P., Rossmann, P., 2000. Determination of the sedimentation coefficient distribution by least-  
946 squares boundary modeling. *Biopolymers* 54, 328-341.
- 947 Terrisse, L., Poirier, J., Bertrand, P., Merched, A., Visvikis, S., Siest, G., Milne, R., Rassart, E., 1998.  
948 Increased levels of apolipoprotein D in cerebrospinal fluid and hippocampus of Alzheimer's  
949 patients. *J Neurochem* 71, 1643-1650.
- 950 Van Dijk, W., Do Carmo, S., Rassart, E., Dahlbäck, B., Sodetz, J.M., 2013. The plasma lipocalins  $\alpha$ 1-acid  
951 glycoprotein, apolipoprotein D, apolipoprotein M and complement protein C8 $\gamma$ .
- 952 Vogt, M., Skerra, A., 2001. Bacterially produced apolipoprotein D binds progesterone and arachidonic  
953 acid, but not bilirubin or E-3M2H. *J Mol Recognit* 14, 79-86.
- 954 Whitten, A.E., Cai, S., Trehwella, J., 2008. MULCh: modules for the analysis of small-angle neutron  
955 contrast variation data from biomolecular assemblies. *Journal of Applied Crystallography* 41,  
956 222-226.
- 957 Wittig, I., Schagger, H., 2008. Features and applications of blue-native and clear-native electrophoresis.  
958 *Proteomics* 8, 3974-3990.
- 959 Yang, B., Wu, Y.J., Zhu, M., Fan, S.B., Lin, J., Zhang, K., Li, S., Chi, H., Li, Y.X., Chen, H.F., Luo,  
960 S.K., Ding, Y.H., Wang, L.H., Hao, Z., Xiu, L.Y., Chen, S., Ye, K., He, S.M., Dong, M.Q., 2012.  
961 Identification of cross-linked peptides from complex samples. *Nat Methods* 9, 904-906.
- 962 Zeng, C., Spielman, A.I., Vowels, B.R., Leyden, J.J., Biemann, K., Preti, G., 1996. A human axillary  
963 odorant is carried by apolipoprotein D. *Proc Natl Acad Sci U S A* 93, 6626-6630.  
964  
965
